# Supplementary material for: Organization and differential expression of the GACA/GATA tagged somatic and spermatozoal transcriptomes in Buffalo Bubalus bubalis
Source: PubMed Central journal article supplement (PMC2346481; doi:10.1186/1471-2164-9-132), 2008-03-20
Supplement: 1471-2164-9-132-S1.pdf [file 1471-2164-9-132-S1.pdf]

**Additional file 1: Distribution of *Bkm* derived GACA/GATA repeats across the species**

| S.No. | Species                         | Chromosome number<br>(Per haploid genome) | (GACA)4 |               | (GATA)4 |               |
|-------|---------------------------------|-------------------------------------------|---------|---------------|---------|---------------|
|       |                                 |                                           | Genome  | Transcriptome | Genome  | Transcriptome |
| 1.    | Archeas                         | -                                         | -       | -             | -       | -             |
| 2.    | <i>Dictyostelium discoideum</i> | 3                                         | +       | -             | -       | -             |
| 3.    | <i>C. elegans</i>               | 6                                         | +       | -             | +       | -             |
| 4.    | <i>Arabidopsis thaliana</i>     | 5                                         | +       | -             | +       | +             |
| 5.    | <i>Saccharomyces cerevisiae</i> | 16                                        | -       | -             | +       | -             |
| 6.    | <i>Gallus gallus</i>            | 33                                        | +       | +             | +       | +             |
| 7.    | <i>Canis familiaris</i>         | 39                                        | +       | +             | +       | -             |
| 8.    | <i>Drosophila melanogaster</i>  | 5                                         | +       | -             | +       | +             |
| 9.    | <i>Danio rerio</i>              | 25                                        | +       | +             | +       | +             |
| 10.   | <i>Sus scrofa</i>               | 19                                        | +       | +             | +       | -             |
| 11.   | <i>Ovis aries</i>               | 27                                        | +       | NA            | +       | NA            |
| 12.   | <i>Capra hircus</i>             | 29                                        | +       | NA            | +       | NA            |
| 13.   | <i>Zea mays</i>                 | 10                                        | +       | -             | +       | +             |
| 14.   | <i>Bos taurus</i>               | 30                                        | +       | +             | +       | +             |
| 15.   | <i>Bubalus bubalis</i>          | 25                                        | +       | +             | +       | +             |
| 16.   | <i>Mus musculus</i>             | 20                                        | +       | +             | +       | +             |
| 17.   | <i>Rattus norvegicus</i>        | 21                                        | +       | +             | +       | +             |
| 18.   | <i>Homo sapiens</i>             | 23                                        | +       | +             | +       | +             |
