# Supplementary material for: Organization and differential expression of the GACA/GATA tagged somatic and spermatozoal transcriptomes in Buffalo Bubalus bubalis
Source: PubMed Central journal article supplement (PMC2346481; doi:10.1186/1471-2164-9-132), 2008-03-20
Supplement: 1471-2164-9-132-S2.pdf [file 1471-2164-9-132-S2.pdf]

## Additional file 2: Occurrences of GACA repeats in the transcriptomes across the species

| S.N. | Encoding genes/Transcripts                                                                          | Species             | Accession no. | Length | Repeat position                                                            |
|------|-----------------------------------------------------------------------------------------------------|---------------------|---------------|--------|----------------------------------------------------------------------------|
| 1.   | Vascular endothelial growth factor (VEGF)                                                           | <i>Homo sapiens</i> | NM_001033756  | 3476   | 498-513                                                                    |
| 2.   | Oxidised low density lipoprotein (lectin-like) receptor 1 (OLR1)                                    | <i>Homo sapiens</i> | NM_002543     | 2476   | 1434-1449                                                                  |
| 3.   | Triggering receptor expressed on myeloid cells-like 2 (TREM2)                                       | <i>Homo sapiens</i> | NM_024807     | 3071   | 2682-2697                                                                  |
| 4.   | Hyaluronan and proteoglycan link protein 2 (HAPLN2)                                                 | <i>Homo sapiens</i> | NM_021817     | 1795   | 111-126                                                                    |
| 5.   | Glycoprotein VI (platelet) (GP6)                                                                    | <i>Homo sapiens</i> | NM_016363     | 2263   | 1216-1231                                                                  |
| 6.   | Protein tyrosine phosphatase, non-receptor type                                                     | <i>Homo sapiens</i> | NM_002832     | 2805   | 27-42                                                                      |
| 7.   | Selenoprotein I (SELI)                                                                              | <i>Homo sapiens</i> | NM_033505     | 8091   | 2222-2237                                                                  |
| 8.   | Cardiomyopathy associated 1 (CMYA1)                                                                 | <i>Homo sapiens</i> | NM_194293     | 6451   | 2188-2203                                                                  |
| 9.   | cAMP responsive element binding protein 3-like 3                                                    | <i>Homo sapiens</i> | NM_032607     | 2586   | 1885-1900<br>1973-1988<br>2007-2022<br>2041-2056<br>2075-2090<br>3319-3334 |
| 10.  | UDP-N-acetyl-alpha-D-galactosamine:polypeptide N-acetylgalactosaminyl transferase 10                | <i>Mus musculus</i> | NM_134189     | 4725   | 3319-3334                                                                  |
| 11.  | Nuclear receptor subfamily 2, group E, member 3 (Nr2E3)                                             | <i>Mus musculus</i> | NM_013708     | 2018   | 100-115                                                                    |
| 12.  | Solute carrier family 25 (mitochondrial carnitine/ acylcarnitine translocase), member 20 (Slc25a20) | <i>Mus musculus</i> | NM_020520     | 1784   | 105-120                                                                    |
| 13.  | Neuropeptide Y receptor Y1 (Npy1r)                                                                  | <i>Mus musculus</i> | NM_010934     | 2157   | 1579-1594                                                                  |
| 14.  | Exocyst complex component 3 (Exoc3)                                                                 | <i>Mus musculus</i> | NM_177333     | 4597   | 3735-3750                                                                  |
| 15.  | Adrenergic receptor, beta 2 (Adrb2)                                                                 | <i>Mus musculus</i> | NM_007420     | 2173   | 1741-1756                                                                  |
| 16.  | Ankyrin repeat domain 43 (Ankrd43)                                                                  | <i>Mus musculus</i> | NM_183173     | 3504   | 2707-2722                                                                  |
| 17.  | Sulfotransferase family 1A, phenol-preferring, member 1 (Sult1a1)                                   | <i>Mus musculus</i> | NM_133670     | 1444   | 940-955                                                                    |
| 18.  | Potassium voltage gated channel, Shaw-related subfamily, member 1 (Kcnc1)                           | <i>Mus musculus</i> | NM_008421     | 12065  | 4416-4435                                                                  |
| 19.  | Poly(A)-specific ribonuclease (deadenylation nuclease)                                              | <i>Mus musculus</i> | NM_028761     | 2903   | 2698-2713                                                                  |
| 20.  | Leucine rich repeat containing 39 (Lrrc39), transcript variant 1                                    | <i>Mus musculus</i> | NM_027321     | 2775   | 1069-1084                                                                  |
| 21.  | Mannoside acetylglucosaminyl transferase 3 (Mgat3)                                                  | <i>Mus musculus</i> | NM_010795     | 4665   | 3581-3596                                                                  |
| 22.  | Bone morphogenetic protein 3 (Bmp3)                                                                 | <i>Mus musculus</i> | NM_173404     | 2282   | 217-232                                                                    |
| 23.  | Ovo-like 2 (Drosophila) (Ovol2)                                                                     | <i>Mus musculus</i> | NM_026924     | 1513   | 1279-1294                                                                  |
| 24.  | Per-pentamer repeat gene (Ppnr)                                                                     | <i>Mus musculus</i> | NM_012022     | 2857   | 738-753<br>754-769                                                         |
| 25.  | Eukaryotic translation initiation factor 2-alpha kinase 2 (Eif2ak2)                                 | <i>Mus musculus</i> | NM_011163     | 4314   | 2109-2124<br>2129-2144                                                     |
| 26.  | Ankyrin repeat and SOCS box-containing protein 1                                                    | <i>Mus musculus</i> | NM_001039126  | 5971   | 3384-3399                                                                  |
| 27.  | Zinc fingers and homeoboxes protein 2 (Zfx2)                                                        | <i>Mus musculus</i> | NM_199449     | 4214   | 50-65                                                                      |
| 28.  | Nuclear factor of activated T-cells 5 (Nfat5)                                                       | <i>Mus musculus</i> | NM_133957     | 13040  | 12461-12476                                                                |
| 29.  | Adaptor-related protein complex 3, sigma 2                                                          | <i>Mus musculus</i> | NM_009682     | 5781   | 2006-2021                                                                  |
| 30.  | Bromodomain containing 1 (Brd1)                                                                     | <i>Mus musculus</i> | NM_001033274  | 4702   | 3560-3575<br>3576-3591                                                     |
| 31.  | Oxysterol binding protein-like 6 (Osbp16)                                                           | <i>Mus musculus</i> | NM_145525     | 8055   | 7383-7398<br>7399-7414                                                     |
| 32.  | Forkhead box K1 (Foxk1)                                                                             | <i>Mus musculus</i> | NM_199068     | 7462   | 6044-6059                                                                  |
| 33.  | Serine-arginine repressor protein (Srrp)                                                            | <i>Mus musculus</i> | NM_177774     | 2940   | 2128-2143                                                                  |

|     |                                                                                                                               |                          |              |      |           |
|-----|-------------------------------------------------------------------------------------------------------------------------------|--------------------------|--------------|------|-----------|
| 34. | Coatomer protein complex, subunit gamma 2 (Copg2)                                                                             | <i>Mus musculus</i>      | NM_017478    | 3200 | 2535-2550 |
| 35. | Nudix (nucleoside diphosphate linked moiety X)-type motif 7 (Nudt7)                                                           | <i>Mus musculus</i>      | NM_024446    | 2795 | 1348-1363 |
| 36. | ATPase, H+ transporting, lysosomal V0 subunit D2                                                                              | <i>Mus musculus</i>      | NM_175406    | 2523 | 1678-1693 |
| 37. | Lymphocyte-activation gene 3 (Lag3)                                                                                           | <i>Mus musculus</i>      | NM_008479    | 2003 | 269-284   |
| 38. | Thioredoxin domain containing 9 (Txndc9)                                                                                      | <i>Mus musculus</i>      | NM_172054    | 3267 | 827-842   |
| 39. | Interphotoreceptor matrix proteoglycan 1 (Impg1)                                                                              | <i>Mus musculus</i>      | NM_022016    | 3675 | 3635-3650 |
| 40. | Coiled-coil domain containing 65 (Ccdc65)                                                                                     | <i>Mus musculus</i>      | NM_153518    | 1880 | 1764-1779 |
| 41. | Phosphoglucomutase 5 (Pgm5)                                                                                                   | <i>Mus musculus</i>      | XM_989276    | 3082 | 2002-2017 |
| 42. | Mitogen activated protein kinase 14 (Mapk14)                                                                                  | <i>Rattus norvegicus</i> | NM_031020    | 3452 | 1533-1548 |
| 43. | amyloid beta (A4) precursor protein binding, family B, member 2                                                               | <i>Rattus norvegicus</i> | XM_001077874 | 5647 | 5500-5515 |
| 44. | Neurofilament triplet H protein (200 kDa neurofilament protein) Neuro-filament heavy polypeptide (NF-H), transcript variant 2 | <i>Rattus norvegicus</i> | XM_001065919 | 3985 | 2923-2954 |
| 45. | Kinesin-Like Protein family member (klp-6)                                                                                    | <i>Rattus norvegicus</i> | XR_007915    | 2817 | 795-825   |
| 46. | Eph receptor A6                                                                                                               | <i>Rattus norvegicus</i> | XM_221595    | 3704 | 2590-2605 |
| 47. | RNA-binding protein Musashi2-S                                                                                                | <i>Rattus norvegicus</i> | XM_001081205 | 6780 | 5811-5826 |
| 48. | Cardiomyopathy associated 1                                                                                                   | <i>Rattus norvegicus</i> | XM_001077697 | 6093 | 1971-1988 |
| 49. | SWI/SNF-related matrix-associated actin-dependent regulator of chromatin subfamily C member 1                                 | <i>Rattus norvegicus</i> | XM_001077020 | 3960 | 3735-3750 |
| 50. | Spastin                                                                                                                       | <i>Rattus norvegicus</i> | XM_001065741 | 3928 | 3710-3725 |
| 51. | tyrosine phosphatase, non-receptor type 3, transcript variant 1 (Ptpn3)                                                       | <i>Rattus norvegicus</i> | XM_001055737 | 4556 | 3914-3941 |
| 52. | WD repeat domain 40A                                                                                                          | <i>Rattus norvegicus</i> | XM_001059812 | 3588 | 2992-3007 |
| 53. | Syntaphilin                                                                                                                   | <i>Rattus norvegicus</i> | XM_001060677 | 4595 | 2319-2334 |
| 54. | ATPase, H transporting, lysosomal V1 subunit B1                                                                               | <i>Rattus norvegicus</i> | XM_001073086 | 2514 | 2273-2284 |
| 55. | Exocyst complex component 4 (Exo4)                                                                                            | <i>Rattus norvegicus</i> | XM_001063828 | 3269 | 1005-1044 |
| 56. | G protein-coupled receptor 21                                                                                                 | <i>Rattus norvegicus</i> | XM_001054010 | 4576 | 4138-4160 |
| 57. | Sterile alpha motif domain containing 10                                                                                      | <i>Rattus norvegicus</i> | XM_575305    | 2489 | 1903-1923 |
| 58. | Actin-binding LIM protein 1                                                                                                   | <i>Rattus norvegicus</i> | XM_001072903 | 5482 | 2422-2445 |
| 59. | Heat shock 70kDa protein 12A                                                                                                  | <i>Rattus norvegicus</i> | XM_001065021 | 5763 | 4017-4051 |
| 60. | PDZ domain containing 1 (Pdzk10)                                                                                              | <i>Rattus norvegicus</i> | NM_031712    | 2005 | 1744-1759 |
| 61. | Neuropeptide Y receptor Y1 (Npy1r)                                                                                            | <i>Rattus norvegicus</i> | NM_001013032 | 1801 | 724-746   |
| 62. | cAMP responsive element binding protein 3-like 3 (Creb3l3)                                                                    | <i>Rattus norvegicus</i> | NM_001012115 | 1956 | 1634-1651 |
| 63. | Flotillin 2 (Flot2)                                                                                                           | <i>Rattus norvegicus</i> | NM_031830    | 2629 | 1697-1739 |
| 64. | Transforming, acidic coiled-coil containing protein 3 (Tacc3)                                                                 | <i>Rattus norvegicus</i> | NM_001004424 | 2042 | 1922-1937 |
| 65. | Transforming acidic coiled-coil-containing protein 3 (ERIC-1)                                                                 | <i>Bos taurus</i>        | XM_582609    | 2649 | 2545-2560 |
| 66. | TNNI3 interacting kinase                                                                                                      | <i>Bos taurus</i>        | XM_616055    | 1890 | 181-196   |
| 67. | Cathepsin D (lysosomal aspartyl protease)                                                                                     | <i>Bos taurus</i>        | XM_863994    | 1907 | 1445-1460 |
| 68. | Beta-1,3-N-acetylglucosaminyl transferase lunatic fringe                                                                      | <i>Bos taurus</i>        | XM_594357    | 2741 | 1807-1875 |

|     |                                                                                 |                           |              |      |                        |
|-----|---------------------------------------------------------------------------------|---------------------------|--------------|------|------------------------|
| 69. | Nuclear protein 1 (Protein p8)                                                  | <i>Bos taurus</i>         | XM_867457    | 864  | 289-304                |
| 70. | Keratin 13                                                                      | <i>Bos taurus</i>         | XM_584070    | 1615 | 1490-1505              |
| 71. | Raptor                                                                          | <i>Bos taurus</i>         | XM_583606    | 4464 | 4021-4036              |
| 72. | Carbohydrate (keratan sulfate Gal-6) sulfotransferase 1                         | <i>Bos taurus</i>         | XM_872521    | 5309 | 1911-1926              |
| 73. | Transducin-like enhancer protein 3 (ESG3)                                       | <i>Bos taurus</i>         | XM_872521    | 5309 | 4266-4281              |
| 74. | Cholecystokinin type A receptor                                                 | <i>Bos taurus</i>         | XM_582625    | 2784 | 2619-2634              |
| 75. | Heat-shock protein beta-7 (HspB7)                                               | <i>Bos taurus</i>         | XM_589727    | 1505 | 856-871                |
| 76. | Vascular endothelial growth factor (VEGF)                                       | <i>Bos taurus</i>         | NM_174216    | 1536 | 12-27                  |
| 77. | 2',3'-cyclic nucleotide 3' phosphodiesterase (CNP)                              | <i>Gallus gallus</i>      | NM_205050    | 2762 | 1746-1761              |
| 78. | Solute carrier family 29                                                        | <i>Canis familiaris</i>   | NM_001003367 | 2010 | 1733-1748              |
| 79. | Uroplakin 3B isoform b                                                          | <i>Canis familiaris</i>   | XM_844944    | 1062 | 90-105                 |
| 80. | Apolipoprotein A-IV (APOA4)                                                     | <i>Sus scrofa</i>         | NM_214388    | 1388 | 1285-1300              |
| 81. | RNA binding motif protein 5 (RBM5)                                              | <i>Gallus gallus</i>      | NM_001012780 | 3317 | 3166-3180              |
| 82. | Ras GTPase-activating protein SynGAP (Synaptic-Ras-GTPase-activating protein 1) | <i>Danio rerio</i>        | XM_685791    | 1800 | 508-523                |
| 83. | Poly(rC)-binding protein 3                                                      | <i>Danio rerio</i>        | XM_703071    | 1177 | 981-996                |
| 84. | Striatin, calmodulin binding protein 3                                          | <i>Danio rerio</i>        | XM_686488    | 3470 | 1710-1725              |
| 85. | Nicotinamide nucleotide adenylyltransferase 2 (nmnat2)                          | <i>Danio rerio</i>        | NM_200004    | 1620 | 1047-1062              |
| 86. | NMDA receptor-regulated gene 1b (narg1b)                                        | <i>Danio rerio</i>        | NM_203321    | 3206 | 2924-2939              |
| 87. | Inhibitor of kappa light polypeptide gene enhancer in B-cells, kinase beta      | <i>Xenopus tropicalis</i> | NM_001005651 | 2992 | 237-252                |
| 88. | CASP2 and RIPK1 domain containing adaptor with death domain (cradd)             | <i>Xenopus tropicalis</i> | NM_001006910 | 1711 | 1032-1047<br>1044-1056 |
