# Supplementary material for: Organization and differential expression of the GACA/GATA tagged somatic and spermatozoal transcriptomes in Buffalo Bubalus bubalis
Source: PubMed Central journal article supplement (PMC2346481; doi:10.1186/1471-2164-9-132), 2008-03-20
Supplement: 1471-2164-9-132-S3.pdf [file 1471-2164-9-132-S3.pdf]

### Additional file 3: Occurrences of GATA repeats in the transcriptomes across the species

| S.N. | Encoding genes/Transcripts                                                                    | Species                  | Accession no. | Length | Repeat position                     |
|------|-----------------------------------------------------------------------------------------------|--------------------------|---------------|--------|-------------------------------------|
| 1.   | Sorting nexin 1 (SNX1)                                                                        | <i>Homo sapiens</i>      | NM_152826     | 8077   | 4827-4869                           |
| 2.   | Ras association (RalGDS/AF-6) and pleckstrin homology domains 1 (RAPH1)                       | <i>Homo sapiens</i>      | NM_213589     | 9615   | 9356-9374                           |
| 3.   | Ankyrin repeat domain 5 (ANKRD5)                                                              | <i>Homo sapiens</i>      | NM_198798     | 3775   | 3463-3536                           |
| 4.   | Peripheral myelin protein 2 (PMP2)                                                            | <i>Homo sapiens</i>      | NM_002677     | 3579   | 2330-2372                           |
| 5.   | NK2 transcription factor related, locus 3                                                     | <i>Homo sapiens</i>      | NM_145285     | 2083   | 1883-1903                           |
| 6.   | Potassium channel, subfamily K, member 2 (KCNK2)                                              | <i>Homo sapiens</i>      | NM_001017425  | 3212   | 2168-2217                           |
| 7.   | Coiled-coil and C2 domain containing 1B (CC2D1B)                                              | <i>Homo sapiens</i>      | NM_032449     | 5639   | 2913-2933                           |
| 8.   | Origin recognition complex, subunit 6 like (yeast) (ORC6L)                                    | <i>Homo sapiens</i>      | NM_014321     | 1647   | 1395-1449                           |
| 9.   | Glycerophosphodiester phosphodiesterase domain containing 4 (GDPD4)                           | <i>Homo sapiens</i>      | NM_182833     | 2545   | 1806-1824                           |
| 10.  | TBP-associated factor 9L                                                                      | <i>Homo sapiens</i>      | XM_925841     | 6660   | 3192-3232                           |
| 11.  | Kynurenine 3-monooxygenase (kynurenine 3-hydroxylase)                                         | <i>Homo sapiens</i>      | NM_003679     | 4992   | 2086-2152                           |
| 12.  | Solute carrier family 11 (proton-coupled divalent metal ion transporters), member 1 (SLC11A1) | <i>Homo sapiens</i>      | NM_000578     | 3865   | 2402-2422                           |
| 13.  | Regulator of G-protein signalling 5 (RGS5)                                                    | <i>Homo sapiens</i>      | NM_003617     | 5848   | 3144-3158                           |
| 14.  | WD repeat domain 72 (WDR72)                                                                   | <i>Homo sapiens</i>      | NM_182758     | 5900   | 4373-4388                           |
| 15.  | Zinc finger and BTB domain containing 4 (ZBTB4)                                               | <i>Homo sapiens</i>      | NM_020899     | 5888   | 5245-5259                           |
| 16.  | Sialic acid binding Ig-like lectin 1, sialoadhesin (Siglec1)                                  | <i>Mus musculus</i>      | NM_011426     | 6875   | 6818-6872                           |
| 17.  | Simple repeat sequence-containing transcript (Srst)                                           | <i>Mus musculus</i>      | NM_009276     | 1263   | 1080-1132                           |
| 18.  | Extracellular matrix protein 2                                                                | <i>Mus musculus</i>      | NM_001012324  | 3627   | 3243-3275                           |
| 19.  | SH3-domain GRB2-like 2 (Sh3gl2)                                                               | <i>Mus musculus</i>      | NM_019535     | 2817   | 1724-1784<br>1833-1861<br>1972-2008 |
| 20.  | Bone morphogenetic protein 8b (Bmp8b)                                                         | <i>Mus musculus</i>      | NM_007559     | 2942   | 1940-2008                           |
| 21.  | Choline kinase alpha (Chka)                                                                   | <i>Mus musculus</i>      | NM_001025566  | 3644   | 1414-1446                           |
| 22.  | Melanocortin 3 receptor (Mc3r)                                                                | <i>Mus musculus</i>      | NM_008561     | 2624   | 205-237                             |
| 23.  | Neurotrophic tyrosine kinase, receptor, type 2 (Ntrk2)                                        | <i>Mus musculus</i>      | NM_008745     | 7022   | 2533-2585<br>2662-2688              |
| 24.  | 6-phosphofructo-2-kinase/fructose-2,6-biphosphatase 3 (Pfkfb3)                                | <i>Mus musculus</i>      | NM_133232     | 4991   | 3515-3565                           |
| 25.  | N-acylsphingosine amidohydrolase (acid ceramidase)-like (Asah1)                               | <i>Mus musculus</i>      | NM_025972     | 1827   | 1525-1568                           |
| 26.  | Prokineticin receptor 2 (Prokr2)                                                              | <i>Mus musculus</i>      | NM_144944     | 3655   | 1767-1786                           |
| 27.  | NACHT, LRR and PYD containing protein 12, transcript variant 1 (Nalp12)                       | <i>Mus musculus</i>      | XM_973733     | 3169   | 2796-2828                           |
| 28.  | Protein phosphatase 1, regulatory (inhibitor) subunit 3E (Ppp1r3e)                            | <i>Mus musculus</i>      | XM_989516     | 3996   | 350-400                             |
| 29.  | Similar to 60S ribosomal protein L29                                                          | <i>Mus musculus</i>      | XM_975825     | 1904   | 33-79                               |
| 30.  | RAB11 family interacting protein 1                                                            | <i>Mus musculus</i>      | XM_922410     | 2326   | 1980-2006                           |
| 31.  | Myosin VC, transcript variant 9 (Myo5c)                                                       | <i>Mus musculus</i>      | XM_925601     | 2253   | 1498-1554                           |
| 32.  | Sorbin and SH3 domain containing 2, transcript variant 1 (Sorbs2)                             | <i>Mus musculus</i>      | XM_989416     | 892    | 634-698                             |
| 33.  | Nidogen 1 (Nid1)                                                                              | <i>Rattus norvegicus</i> | XM_213954     | 5220   | 5180-5220                           |
|      | Solute carrier family 10, member 2 (Slc10a2)                                                  | <i>Rattus norvegicus</i> | NM_017222     | 4269   | 1725-1779                           |
| 34.  | Myotubularin related protein 2                                                                | <i>Rattus norvegicus</i> | XM_001068538  | 3668   | 3449-3515                           |
| 35.  | Neurotrophic tyrosine kinase, receptor, type 2 (Ntrk2)                                        | <i>Rattus norvegicus</i> | NM_012731     | 4797   | 3404-3422                           |
| 36.  | Solute carrier organic anion transporter family, member 1b2 (Slco1b2)                         | <i>Rattus norvegicus</i> | NM_031650     | 3212   | 2778-2918<br>2951-3005              |

|     |                                                                                                           |                                |              |      |           |
|-----|-----------------------------------------------------------------------------------------------------------|--------------------------------|--------------|------|-----------|
| 37. | Cytochrome P450, subfamily 11B, polypeptide 1 (Cyp11b1)                                                   | <i>Rattus norvegicus</i>       | NM_012537    | 2696 | 1944-1984 |
| 38. | C-reactive protein, pentraxin-related (Crp)                                                               | <i>Rattus norvegicus</i>       | NM_017096    | 1678 | 1216-1310 |
| 39. | Neurotrophic tyrosine kinase, receptor, type 3 isoform b                                                  | <i>Bos taurus</i>              | XM_585006    | 1689 | 1533-1547 |
| 40. | LIM and senescent cell antigen-like domains 1                                                             | <i>Gallus gallus</i>           | XM_423884    | 4725 | 259-274   |
| 41. | Ran-binding protein 2                                                                                     | <i>Gallus gallus</i>           | XM_423497    | 1165 | 2-17      |
| 42. | Calpain inhibitor (Calpastatin)                                                                           | <i>Gallus gallus</i>           | XM_424713    | 3551 | 348-365   |
| 43. | Synuclein, beta (SNCB)                                                                                    | <i>Gallus gallus</i>           | NM_204671    | 1253 | 998-1018  |
| 44. | Iduronidase, alpha-L- (IDUA)                                                                              | <i>Gallus gallus</i>           | NM_001031433 | 4906 | 522-537   |
| 45. | Poly(rC)-binding protein 3 (Alpha-CP3), transcript variant 2                                              | <i>Danio rerio</i>             | XM_703071    | 1177 | 1053-1161 |
| 46. | Monoamine oxidase (mao)                                                                                   | <i>Danio rerio</i>             | NM_212827    | 4456 | 2604-2780 |
| 47. | Forkhead box O5 (foxo5)                                                                                   | <i>Danio rerio</i>             | NM_131085    | 4547 | 72-88     |
| 48. | Protocadherin 1 gamma b 2 (pcdh1gb2)                                                                      | <i>Danio rerio</i>             | NM_001012658 | 4332 | 4129-4147 |
| 49. | Tumor protein D52-like 2 (tpd52l2)                                                                        | <i>Danio rerio</i>             | NM_199582    | 2259 | 1064-1078 |
| 50. | ADP-ribosylation factor 3a (arf3a)                                                                        | <i>Danio rerio</i>             | NM_001003441 | 1475 | 798-814   |
| 51. | CASP2 and RIPK1 domain containing adaptor with death domain (cradd)                                       | <i>Xenopus tropicalis</i>      | NM_001006910 | 1711 | 1000-1032 |
| 52. | Phosphodiesterase 6 CG8279-RA (Pde6),                                                                     | <i>Drosophila melanogaster</i> | NM_142112    | 5136 | 4076-4099 |
| 53. | CXIP1 (CAX INTERACTING PROTEIN 1)                                                                         | <i>Arabidopsis thaliana</i>    | NM_115347    | 806  | 589-604   |
| 54. | NADK1; NAD+ kinase (NADK1)                                                                                | <i>Arabidopsis thaliana</i>    | NM_113001    | 2323 | 1754-1768 |
| 55. | ATP binding / kinase/ protein kinase/ protein serine/threonine kinase/protein-tyrosine kinase (AT4G31170) | <i>Arabidopsis thaliana</i>    | NM_001036681 | 1735 | 1543-1557 |
| 56. | Knotted1-like homeodomain protein liguleless3 (lg3)                                                       | <i>Zea Mays</i>                | AF457124     | 912  | 713-729   |
| 57. | Glutamine synthetase (gs1-2)                                                                              | <i>Zea Mays</i>                | AF359511     | 1505 | 1345-1361 |
| 58. | Ramosa 2 (ra2)                                                                                            | <i>Zea Mays</i>                | DQ327701     | 6032 | 3742-3762 |
| 59. | Cinnamoyl-CoA reductase (ccr2)                                                                            | <i>Zea Mays</i>                | AY227034     | 1239 | 1181-1198 |
