# Supplementary material for: Organization and differential expression of the GACA/GATA tagged somatic and spermatozoal transcriptomes in Buffalo Bubalus bubalis
Source: PubMed Central journal article supplement (PMC2346481; doi:10.1186/1471-2164-9-132), 2008-03-20
Supplement: 1471-2164-9-132-S4.pdf [file 1471-2164-9-132-S4.pdf]

**Additional file 4: Details of the Oligos used for MASA, RT-PCR,  
Copy number calculation and Relative expressional studies**

| S.N. | OLIGO ID | GENE ID | SEQUENCE (5'-3') | ANNEALING TEMP (IN °C) |
|------|----------|---------|------------------|------------------------|
|------|----------|---------|------------------|------------------------|

**Repeat sequence motifs based on GACA/GATA for identification of tagged transcripts**

|    |         |    |                         |      |
|----|---------|----|-------------------------|------|
| 1. | OAT15.2 | NA | ACAGACAGACAGACA         | 54.5 |
| 2. | OAT18.2 | NA | ACAGACAGACAGACAGACA     | 56.8 |
| 3. | OAT24.2 | NA | ACAGACAGACAGACAGACAGACA | 60   |
| 4. | OAT15.1 | NA | ATAGATAGATAGATA         | 53.6 |
| 5. | OAT18.1 | NA | ATAGATAGATAGATAGATA     | 54.9 |
| 6. | OAT24.1 | NA | ATAGATAGATAGATAGATAGATA | 59.5 |

**Internal Primers Designed for the Identified Genes/Gene Fragments**

**A. For GACA tagged transcripts**

|     |         |          |                                     |      |
|-----|---------|----------|-------------------------------------|------|
| 1.  | JSO466  | DQ304116 | F ACT GTT TGG TGT TTC TAC TCC TGA C | 60   |
| 2.  | JSO467  |          | R GAA GAC ACA GAT AGG GTG GTT GAT   |      |
| 3.  | JSO468  | DQ534905 | F CTG TTG CCT TGT AGG GTT TAT ACT G | 61   |
| 4.  | JSO469  |          | R AGA AAC CAG TCA TCA CTG TCA CAA A |      |
| 5.  | JSO478  | DQ289479 | F TAA GGC TTC AAA AAC CAG ACC A     | 64   |
| 6.  | JSO479  |          | R ACC AAG ACA GAG TTC CCT CCT C     |      |
| 7.  | JSO480  | DQ494483 | F ACC ACA CAT CAA CTG GAA AAC C     | 64.5 |
| 8.  | JSO481  |          | R CCC TGG GAT TAA GAC TCC AAA C     |      |
| 9.  | JSO663  | DQ534902 | F TCT TTC AGA GGC TAA TTG GGA TT    | 62   |
| 10. | JSO664  |          | R GTT TGA GGG TTA AAT GGG AGA AT    |      |
| 11. | JSO665  | DQ534907 | F GGT TTC AGT TCT GAC TCT GCT GT    | 64   |
| 12. | JSO666  |          | R AAT GTG AGC CCC TAA ATA CAC AA    |      |
| 13. | JSO669  | DQ534908 | F ATC GAC ACA CTG GCA CAG AC        | 62   |
| 14. | JSO670  |          | R GAC CTT TGA GAC CTC GGA TG        |      |
| 15. | JSO673  | DQ534909 | F AGC AAC ACA GGG CAA CAT TT        | 59   |
| 16. | JSO674  |          | R AGG ACA ACA CGT GCA ACA GT        |      |
| 17. | JSO675  | DQ534910 | F TAC CAT TGT CCA AGT TCA AA        | 62   |
| 18. | JSO676  |          | R AGT GGC ACG TTC TGG AAT TT        |      |
| 19. | JSO679  | DQ534906 | F GAC CTT TGA GAC CTC GGA TG        | 58   |
| 20. | JSO680  |          | R ATC GAC ACA CTG GCA CAG AC        |      |
| 21. | JSO683  | DQ534904 | F TGG CAT GTA CAT CAG GTT GC        | 58   |
| 22. | JSO684  |          | R AGG CTA GGG GTA CTC CGT GT        |      |
| 23. | JSO687  | DQ834345 | F GCA GGA GAT GTG GGT TCA AT        | 60   |
| 24. | JSO688  |          | R CCC AAA ATC CCA TAT GGT TG        |      |
| 25. | JSO691  | DQ494485 | F ACA AAA TCA CGG GTC TCG TC        | 64   |
| 26. | JSO692  |          | R CAG GAG GTG ACT ACC CCA GA        |      |
| 27. | JSO1221 | DQ834344 | F CCTTCTTCAGGGGATCTTCC              | 58   |
| 28. | JSO1222 |          | R CATCGCCTTGTGTCAGAGTG              |      |

|     |         |          |                                 |      |
|-----|---------|----------|---------------------------------|------|
| 29. | JSO1223 | DQ789047 | F ACGGCTGTCCATCTTGTTTC          | 56.5 |
| 30. | JSO1224 |          | R AATGGCAACCCACTCCAATA          |      |
| 31. | JSO1225 | DQ789048 | F ACTCACCATCCGTCCTGTTCTA        | 58   |
| 32. | JSO1226 |          | R CCTAGGGTCCAAAACCTGTGCTT       |      |
| 33. | JSO1227 | DQ789049 | F GGCAGTACTGGTTCTGGATGAC        | 59   |
| 34. | JSO1228 |          | R TTATGAGGACTCAAGCTCAGCA        |      |
| 35. | JSO1322 | DQ834346 | F ACACGCAAAACCTGACTTGTGA        | 58   |
| 36. | JSO1323 |          | R TGCCTATGGATGGTTGTTGCTA        |      |
| 37. | JSO1324 | DQ845142 | F TATTGATCAGTCCTGGGGGTTT        | 58.5 |
| 38. | JSO1325 |          | R GCTGCTACAGCCTTAGGAATCAA       |      |
| 39. | JSO1326 | DQ845143 | F GAAGCATTCTCGGATGTCA           | 56.5 |
| 40. | JSO1327 |          | R AGACACGTTGAGGGGGAGTT          |      |
| 41. | JSO1328 | DQ845145 | F ACACTCTGTGCTTAGGGCTCTG        | 58   |
| 42. | JSO1329 |          | R TCAGAGCCAAGTCTCTCTGACC        |      |
| 43. | JSO1330 | DQ845146 | F ATCCTCTTGCCCTTTTTTCAGAG       | 59.5 |
| 44. | JSO1331 |          | R ATCTGACCTGCAATCAGAGGAG        |      |
| 45. | JSO1360 | DQ904037 | F AAGAAAGTGGTGGACAAGCTGA        | 58   |
| 46. | JSO1361 |          | R CAGACACACAAAGAAGCAAGCA        |      |
| 47. | JSO1362 | DQ904038 | F CAGGAGCTCAGCTGGTAAAGAA        | 56   |
| 48. | JSO1363 |          | R CACGAGTGTGGTCTTTGGAAAT        |      |
| 49. | JSO1364 | DQ904039 | F TGCATTTGCTGTGATTTAGGTG        | 58   |
| 50. | JSO1365 |          | R TCTTCGGGAGTCAAACAGGATA        |      |
| 51. | JSO1366 | DQ913640 | F CAGACAACCTGCAACATCACCAT       | 60   |
| 52. | JSO1367 |          | R TTCTGTTCTGAGTCCCACTTC         |      |
| 53. | JSO1368 | DQ913641 | F GAAACAGGGAGAAAGACAAGCA        | 58   |
| 54. | JSO1369 |          | R CAGCCACACACAGAGGTAAGTA        |      |
| 55. | JSO1370 | DQ913642 | F GCAACCCACTCCAGTGTCTTA         | 57   |
| 56. | JSO1371 |          | R GAGTGGGAGGTGTTGTGTCAGT        |      |
| 57. | JSO1372 | DQ913644 | F CCGTGAGTTACTGATGGACAGG        | 59   |
| 58. | JSO1373 |          | R GACAGACATCAAAGGCTGACC         |      |
| 59. | JSO1374 | DQ913645 | F CAGACAGACACTTGGGGCTA          | 57   |
| 60. | JSO1375 |          | R TGGTGGCTTGTGTCTCACTC          |      |
| 61. | JSO1376 | DQ913646 | F AACCCCCACCTCAAGGAGTA          | 60   |
| 62. | JSO1377 |          | R TATGGCCCTTTCTGTTCTCTG         |      |
| 63. | JSO1070 | BETA-    | F CAG ATC ATG TTC GAG AC TTC AA | 59   |
| 64. | JSO1071 | ACTIN    | R GAT GAT CTT CAT TGT GCT       |      |

## B. For GATA tagged transcripts

|     |         |          |                             |    |
|-----|---------|----------|-----------------------------|----|
| 1.  | JSO1378 | EF050082 | F AATCACCACTTTGCAACCACACT   | 58 |
| 2.  | JSO1379 |          | R CTTCATACCCAGATGCAGACGAT   |    |
| 3.  | JSO1385 | EF050084 | F TAGCAGCAGAAATGGACTCAACC   | 56 |
| 4.  | JSO1386 |          | R ATACCCAGGGATTGGCACATAGT   |    |
| 5.  | JSO1387 | EF051516 | F TTTTGTGTCCTGCAGTTCTCTGA   | 56 |
| 6.  | JSO1388 |          | R CCTTTGTTCTGGGTACGGTGTA    |    |
| 7.  | JSO1389 | EF051517 | F ATCTTGCTTTCTGGAAGACCATC   | 55 |
| 8.  | JSO1390 |          | R CAGTGGAAAATCTGTGTGCAATG   |    |
| 9.  | JSO1391 | EF051518 | F TTAAGCAAGACCCATTCTGTTGC   | 57 |
| 10. | JSO1392 |          | R CAGGAAACATGTCTTTGGTTTTACA |    |
| 11. | JSO1393 | EF051519 | F TTAAGCAAGACCCATTCTGTTGC   | 55 |

|     |         |          |                             |    |
|-----|---------|----------|-----------------------------|----|
| 12. | JSO1394 |          | R CAGGAAACATGTCTTTGGTTTTACA |    |
| 13. | JSO1395 | EF592582 | F GCTACACCACCTTCATGGTCAAC   | 57 |
| 14. | JSO1396 |          | R CATGTGTGTGTGTGTGTGTGTGT   |    |
| 15. | JSO1397 | EF592583 | F GATAGATATGGGCTTCCCTGGTG   | 58 |
| 16. | JSO1398 |          | R GCAAGAATACTGGAGTGCGTTTC   |    |

---

## Real Time Primers for Copy Number Calculation and Relative Expressional Studies

### A. For GACA identified transcripts

---

|     |        |          |                                         |    |
|-----|--------|----------|-----------------------------------------|----|
| 1.  | JSR472 | DQ304116 | F TGA GTG GGA GGA GGA GAA ATA CTT       | 60 |
| 2.  | JSR473 |          | R CTA CCC CAG CCC GGG TTA               |    |
| 3.  | JSR474 | DQ534905 | F GTG AGT TCG TCT CTG GAA ACC AT        | 60 |
| 4.  | JSR475 |          | R CAG ACA ATC TTC CCT GCT TTC TG        |    |
| 5.  | JSR482 | DQ494483 | F GTG GCC CTG TTT GAA AAA CC            | 60 |
| 6.  | JSR483 |          | R TGC GGG AGA GTC TTC CAG AT            |    |
| 7.  | JSR484 | DQ289479 | F CAC CCC TGC AGC TGA TGA A             | 60 |
| 8.  | JSR485 |          | R GGA CTG TCC ACT TGC CTT CCT           |    |
| 9.  | JSR605 | DQ534907 | F TGG GTC ACT CTT CTG CTT CTA ACA       | 60 |
| 10. | JSR606 |          | R CTG CAG AGT CTT TGA GAA TTT TGG       |    |
| 11. | JSR607 | DQ534902 | F AGC GCG GTA CTG CGT GTA A             | 60 |
| 12. | JSR608 |          | R TTG CCC TGT GTC AAC CGA TA            |    |
| 13. | JSR611 | DQ534910 | F AAG GGT AGG ATG CCC ATT GAG           | 60 |
| 14. | JSR612 |          | R GCA CGT TCT GGA ATT TCC TAA AG        |    |
| 15. | JSR615 | DQ534906 | F TCC CTT AGG GAA GCT GCT TCT           | 60 |
| 16. | JSR616 |          | R CGC TCC GAG ATC GAC ACA CAC T         |    |
| 17. | JSR697 | DQ834344 | F TGC CAG GCT CCT CTG TCA CT            | 60 |
| 18. | JSR698 |          | R AAG ATC CCC TGA AGA AGG AAA TG        |    |
| 19. | JSR699 | DQ494485 | F TGT AAC CGG CCA GTG ACT CA            | 60 |
| 20. | JSR700 |          | R CTC CCT GTG ATG CCA GCT TT            |    |
| 21. | JSR701 | DQ534904 | F CTG AGC ATG CAG CCT GTA GGT           | 60 |
| 22. | JSR702 |          | R GTG CAG GCA GGT GTC TAA AGG           |    |
| 23. | JSR703 | DQ534909 | F TTA AAA AAC ACA CCT GAG TTG AAA AGT G | 60 |
| 24. | JSR704 |          | R ATG TGA AGT GCA AGC CTA TTT TAG G     |    |
| 25. | JSR705 | DQ534908 | F CAT CCG CTC CCA GAT CGA               | 60 |
| 26. | JSR706 |          | R CCT CCC TTA GGG AAG CTG CTT           |    |
| 27. | JSR707 | DQ834345 | F TGG CAA CCC ACT CCC GTA T             | 60 |
| 28. | JSR602 |          | R CAT GTC CGA CTT TTT GTG ACC TT        |    |
| 29. | JSR619 | DQ913644 | F TGA GCG ACT GAA CTG AGG TGA A         | 60 |
| 30. | JSR620 |          | R TGA CCG TGA GCC CCA GAA               |    |
| 31. | JSR625 | DQ913645 | F TGT GCC TGA GCA GAC ATG TGT           | 60 |
| 32. | JSR626 |          | R TGT TTG CTT TTC TTT GCC TAC AAT       |    |
| 33. | JSR631 | DQ904039 | F TGA TTT AGG TGG GAG CCT GAG A         | 60 |
| 34. | JSR632 |          | R GTG CCG TCA CCC CTA GGA               |    |
| 35. | JSR635 | DQ904036 | F GTG AGT TCG TCT CTG GAA ACC AT        | 60 |
| 36. | JSR636 |          | R CAG ACA ATC TTC CCT GCT TTC TG        |    |
| 37. | JSR639 | DQ789048 | F ACG AGG AGC CTT GTT TGT CTA C         | 60 |
| 38. | JSR640 |          | R TGC CCA CGT GAC TCT TTC TG            |    |
| 39. | JSR643 | DQ789047 | F GCA CAT TCA AGG GCT CAT TCATCA        | 60 |

|     |         |          |                                            |    |
|-----|---------|----------|--------------------------------------------|----|
| 40. | JSR644  |          | R GGC TGC ATA GTG TCC CTG TCT              |    |
| 41. | JSR818  | DQ789046 | F CGA GGA GCC TTG TTT GTC TAC A            | 60 |
| 42. | JSR819  |          | R TGC CCA CGT GAC TCT TTC TG               |    |
| 43. | JSR649  | DQ845146 | F TCC TCT TGC CCT TTT TCA GAG T            | 60 |
| 44. | JSR650  |          | R ACA CCA GTC ATC AGG TAT GAC ATT G        |    |
| 45. | JSR653  | DQ845144 | F TCC CTT AGG GAA GCT GCT TCT              | 60 |
| 46. | JSR654  |          | R GAG ATC GAC ACA CTG GCA CAG A            |    |
| 47. | JSR661  | DQ916743 | F CAC CCC CCG TGA CTT CCT                  | 60 |
| 48. | JSR662  |          | R GCC TGT TGG GCT CCC TTT                  |    |
| 49. | JSR712  | DQ904038 | F GTA TTC TCG CCT GGA AAT GC               | 60 |
| 50. | JSR711  |          | R CCA ACT CTT ATA GGA CCC ATG GA           |    |
| 51. | JSR714  | DQ845143 | F GAA GGA ACC AGA GCT ACT CAC AGT CTA      | 60 |
| 52. | JSR715  |          | R GGG CAC CGA GGA GTC ATG                  |    |
| 53. | JSR716  | DQ845142 | F GCA TAA GTT TGA GCA AGC TTT GG           | 60 |
| 54. | JSR717  |          | R TAC GAC GTC AGG TAC CCC A                |    |
| 55. | JSR718  | DQ789049 | F TCG GCA TAA GCT GGG AGT AAT              | 60 |
| 56. | JSR719  |          | R CAC CTG ATC GCC ATT TCC A                |    |
| 57. | JSR720  | DQ834346 | F CAT GGT ACA CGT GAA AGA ATG ACT TC       | 60 |
| 58. | JSR721  |          | R TTC CAA TCT TTG CTT TGC ATT AAA TC       |    |
| 59. | JSR724  | DQ834347 | F CAT CCG CTC CGA GAT CGA                  | 60 |
| 60. | JSR725  |          | R CCT CCC TTA GGG AAG CTG CTT              |    |
| 61. | JSR726  | DQ913641 | F CTG GCC TGG TGT TTA TGT ACG A            | 60 |
| 62. | JSR727  |          | R CAG AAA AGG ACT AGA TAC ACG GAA G        |    |
| 63. | JSR728  | DQ913640 | F GAC AAC TGC AAC ATC ACC ATT C            | 60 |
| 64. | JSR729  |          | R AAA GTG CAG CTT TCC AGT CTT GTA          |    |
| 66. | JSR730  | DQ845141 | F CCT GCG CAC AGC AGA CAT A                | 60 |
|     | JSR731  |          | R CAG AGT AAC ACA GCA GAG TCA GAA CTG      |    |
| 67. | JSR732  | DQ904037 | F TGC CAT GAA GGT TCT AAG AAA GTG          | 60 |
| 68. | JSR733  |          | R TGG TTC TGG GTC TCT CTC TAA CTG TAC A    |    |
| 69. | JSR734  | DQ789045 | F TGC AAC AAG TCA CCT GAA AAG ATT          | 60 |
| 70. | JSR735  |          | R GGC CCC GCC GTC TCT                      |    |
| 71. | JSR814  | DQ913646 | F CAA GAC TCT GAG GTG CAA ATG G            | 60 |
| 72. | JSR815  |          | R CTA AGC CCT CAG GCC CCT AT               |    |
| 73. | JSR627  | DQ913642 | F AGT CAG CTG GAG AAG GAA AAG GAA ATG<br>G | 60 |
| 74. | JSR628  |          | R TGT GAC CCC GTG GAC TGT AG               |    |
| 75. | JSR1399 | DQ845145 | F AGG GAA GGC TTC TCA GAG GAA              | 60 |
| 76. | JSR1400 |          | R TGA GAG AGT GGG AAG GGT CTT TC           |    |

## B. For GATA uncovered transcripts

|    |        |          |                                                     |    |
|----|--------|----------|-----------------------------------------------------|----|
| 1. | JSR876 | EF050082 | F ATC ACC ACT TTG CAA CCA CAC T                     | 60 |
| 2. | JSR877 |          | R TTG CCC GCT AGT TTC ACA TTC                       |    |
| 3. | JSR822 | EF050084 | F ACT ATG TGC CAA TCC CTG GGT AT                    | 60 |
| 4. | JSR823 |          | R TTC CTG AGC TCG TCA CTC CAT                       |    |
| 5. | JSR878 | EF051516 | F GCA CTT TCC TTT TGT TAT AGT AGC TTG<br>TAG TAT TC | 60 |
| 6. | JSR879 |          | R TGT TCT GGG TAT GCT GTA AAC CA                    |    |
| 7. | JSR826 | EF051517 | F AGC AGC AGA AAT AAC TAT AGG GTA TCC T             | 60 |
| 8. | JSR827 |          | R TGT ATG CTG TAT CAC AGT GGA AAA TC                |    |

|     |         |          |                                             |    |
|-----|---------|----------|---------------------------------------------|----|
| 9.  | JSR883  | EF051518 | F TGC ATC TGA CCT TTA AGA ACA GAA TT        | 60 |
| 10. | JSR884  |          | R AAG ACT CCA CCT ACA ATG TAC TTT CAC T     |    |
| 11. | JSR1084 | EF592582 | F TGG CAG AGG CAG TCT GTA TCC               | 60 |
| 12. | JSR1085 |          | R GTG TAG CTG CTT GGC TTG CA                |    |
| 13. | JSR1087 | EF592585 | F CCT ACA ATG TAC TTT CAC TTT CAA TCA TC    | 60 |
| 14. | JSR1088 |          | R GCA TCT GAC CTT TAA GAA CAG AAT TTA<br>TG |    |
| 15. | JSR1089 | EF592583 | F AAT ATG GGA GAT CTG GGT TCG A             | 60 |
| 16. | JSR1090 |          | R TGG AGT GCG TTT CCA TGC T                 |    |
| 19. | JSR522  | BETA-    | F TCA CGG AGC GTG GCT ACA G                 | 60 |
| 20. | JSR523  | ACTIN    | R TGG ATG TCA CGG ACG ATT TCC               |    |

---
