# Supplementary material for: Organization and differential expression of the GACA/GATA tagged somatic and spermatozoal transcriptomes in Buffalo Bubalus bubalis
Source: PubMed Central journal article supplement (PMC2346481; doi:10.1186/1471-2164-9-132), 2008-03-20
Supplement: 1471-2164-9-132-S5.pdf [file 1471-2164-9-132-S5.pdf]

## Additional file 5: Multiple sequence alignment of GACA-tagged 1.8 kb transcript originating from different tissues of buffalo

```

Testis      ----ACAGACAGACAGACAGTGGCAGGGTCTACCCTGAAATCAGTCCAGTTCAGTCACTC 56
Ovary      ----ACAGACAGACAGACAGTGGCAGGGTCTACCCTGAAATCAGTCCAGTTCAGTCACTC 56
Spleen     ACAGACAGACAGACAGACAGTGGCAGGGTCTACCCTGAAATCAGTCCAGTTCAGTCACTC 60
Liver      ----ACAGACAGACAGACAGTGGCAGGGTCTACCCTGAAATCAGTCCAGTTCAGTCACTC 56
Lung       ----ACAGACAGACAGACAGCGGCAGGATCTACCTTGAAATCAGTTCAGTTCAGTCACTC 56
Heart      ----ACAGACAGACAGACAGTGGCAGGGTCTACCCTGAAATCAGTCCAGTTCAGTCACTC 56
Brain      ----ACAGACAGACAGACAGTGGCAGGGTCTACCCTGAGATCAGTCCAGTTCAGTCACTC 56
          *****

Testis     AGTCTTATCCGACTCTTTGCGACCCATGGACTGCAGCACACCAGGCTTCCCTGTCCATC 116
Ovary     AGTCTTATCCGACTCTTTGCGACCCATGGACTGCAGCACACCAGGCTTCCCTGTCCATC 116
Spleen    AGTCTTATCCGACTCTTTGCGACCCATGGACTGCAGCACACCAGGCTTCCCTGTCCATC 120
Liver     AGTCTTATCCGACTCTTTGCGACCCATGGACTGCAGCACACCAGGCTTCCCTGTCCATC 116
Lung      AGTCTTATCCGACTCTTTGCGACCCATGGACTGCAGCACACCAGGCTTCCCTGTCCATC 116
Heart     AGTCTTATCCGACTCTTTGCGACCCATGGACTGCAGCACACCAGGCTTCCCTGTCCATC 116
Brain     AGTCTTATCCGACTCTTTGCGACCCATGGACTGCAGCACACCAGGCTTCCCTGTCCATC 116
          ****

Testis     -----GAATCCGTGATGCCATCCAACCAC 140
Ovary     -----GAATCCGTGATGCCATCCAACCAC 140
Spleen    -----GAATCCGTGATGCCATCCAACCAC 144
Liver     -----GAATCCGTGATGCCATCCAACCAC 140
Lung      ACCAACTCCAGAGTTTATTCAAACATCATGTCCATCGAATCCGTGATGCCATCCAACCAC 176
Heart     -----GAATCCGTGATGCCATCCAACCAC 140
Brain     -----GAATCCGTGATGCCATCCAACCAC 140
          *****

Testis     CTCCTCCTCTGTCATCCCCCTTCTCCTCCTGCCTTTAATCTTTCCAGCATCAGGGTATTT 200
Ovary     CTCCTCCTCTGTCATCCCCCTTCTCCTCCTGCCTTTAATCTTTCCAGCATCAGGGTATTT 200
Spleen    CTCCTCCTCTGTCATCCCCCTTCTCCTCCTGCCTTTAATCTTTCCAGCATCAGGGTATTT 204
Liver     CTCCTCCTCTGTCATCCCCCTTCTCCTCCTGCCTTTAATCTTTCCAGCATCAGGGTATTT 200
Lung      TTCCTCCTCTGTCATCCCCCTTCTCCTCCTGCCTTTAATCTTTCCAGCATCAGGGTATTT 236
Heart     CTCCTCCTCTGTCATCCCCCTTCTCCTCCTGCCTTTAATCTTTCCAGCATCAGGGTATTT 200
Brain     CTCCTCCTCTGTCATCCCCCTTCTCCTCCTGCCTTTAATCTTTCCAGCATCAGGGTATTT 200
          *****

Testis     TCAAATGAGTCAGTTCTTCGCATCAGGTGGCCAAAGGATTGGAGTTTCAGCTTCAACACC 260
Ovary     TCAAATGAGTCAGTTCTTCGCATCAGGTGGCCAAAGGATTGGAGTTTCAGCTTCAACACC 260
Spleen    TCAAATGAGTCAGTTCTTCGCATCAGGTGGCCAAAGGATTGGAGTTTCAGCTTCAACACC 264
Liver     TCAAATGAGTCAGTTCTTCGCATCAGGTGGCCAAAGGATTGGAGTTTCAGCTTCAACACC 260
Lung      TCAAATGAGTCAGTTCTTCGCATCAGGTGGCCAAAGGATTGGAGTTTCAGCTTCAACACC 296
Heart     TCAAATGAGTCAGTTCTTCGCATCAGGTGGCCAAAGGATTGGAGTTTCAGCTTCAACACC 260
Brain     TCAAATGAGTCAGTTCTTCGCATCAGGTGGCCAAAGGATTGGAGTTTCAGCTTCGACACC 260
          *****

Testis     AGTCCTTCCAATGAATATTCAGGACTTATTTCTTTAGGATGGACTGGTTAGATCTCCTT 320
Ovary     AGTCCTTCCAATGAATATTCAGGACTTATTTCTTTAGGATGGACTGGTTAGATCTCCTT 320
Spleen    AGTCCTTCCAATGAATATTCAGGACTTATTTCTTTAGGATGGACTGGTTAGATCTCCTT 324
Liver     AGTCCTTCCAATGAATATTCAGGACTTATTTCTTTAGGATGGACTGGTTAGATCTCCTT 320
Lung      AGTTCCTTCCAATGAATATTCAGGATTTGATTTCTGTTTAGGATGGACTGGTTAGATCTCCTT 356
Heart     AGTCCTTCCAATGAATATTCAGGACTTATTTCTTTAGGATGGACTGGTTAGATCTCCTT 320
Brain     AGTCCTTCCAATGAATATTCAGGACTTATTTCTTTAGGATGGACTGGTTAGATCTCCTT 320
          ***

Testis     GCTGTCCAAGGGACTCTCAAGAGTCTTCTCCAACACCACACACACAGTTCAAAAGCACCAA 380
Ovary     GCTGTCCAAGGGACTCTCAAGAGTCTTCTCCAACACCACACACACAGTTCAAAAGCACCAA 380
Spleen    GCTGTCCAAGGGACTCTCAAGAGTCTTCTCCAACACCACACACACAGTTCAAAAGCACCAA 384
Liver     GCTGTCCAAGGGACTCTCAAGAGTCTTCTCCAACACCACACACACAGTTCAAAAGCACCAA 380
Lung      GCTGTCCAAGGGACTCTCAAGAGTCTTCTCCAACACCACACACAGTTCAAAAGCACCAA 416
  
```

Heart GCTGTCCAAGGGACTCTCAAGAGTCTTCTCCAACACCACAC**G**ACAGTTCAAAGCACCAA 380  
Brain GCTGTCCAAGGGACTCTCAAGAGTCTTCTCCAACACCACAC**A**ACAGTTCAAAGCACCAA 380  
\*\*\*\*\*

Testis TTCTTCAGTGCTCAGA-ATT**C**TATTTTTT-GAAATGGGCGTCCCCTATTTCAAAGTGAGA 438  
Ovary TTCTTCAGTGCTCAGA-ATT**C**TATTTTTT-GAAATGGGCGTCCCCTATTTCAAAGTGAGA 438  
Spleen TTCTTCAGTGCTCAGA-ATT**C**TATTTTTTTTGAATGGGCGTCCCCTATTTCAAAGTGAGA 443  
Liver TTCTTCAGTGCTCAGA-ATT**C**TATTTTTTTTGAATGGGCGTCCCCTATTTCAAAGTGAGA 439  
Lung TTCTTC**G**TGCTCAG**C**TATTTTATTTTTTTTGA**A**G**T**GGG**C**A**T**CCCCTATTTCAAAGTGAGA 476  
Heart TTCTTCAGTGCTCAGA-ATT**T**TATTTTTTTTGAATGGGCGTCCCCTATTTCAAAGTGAGA 439  
Brain TTCTTCAGTGCTCAGA-ATT**T**TATTTTTTTTGAATGGGCGTCCCCTATTTCAAAGTGAGA 439  
\*\*\*\*\*

Testis CCAGGGCCCAAGGGCTGAGAGGATCCTCCACCTACCTCTAAGGCTTCAAAAACAGACCA 498  
Ovary CCAGGGCCCAAGGGCTGAGAGGATCCTCCACCTACCTCTAAGGCTTCAAAAACAGACCA 498  
Spleen CCAGGGCCCAAGGGCTGAGAGGATCCTCCACCTACCTCTAAGGCTTCAAAAACAGACCA 503  
Liver CCAGGGCCCAAGGGCTGAGAGGATCCTCCACCTACCTCTAAGGCTTCAAAAACAGACCA 499  
Lung CCAGGGCCCAAGGG**C**TGAGGGAT**C**TT**G**C**C**T**A**G**C**T**C**T**A**G**G**C**T**T**C**A**A**A**A**C**C**A**G**A**C**A**A** 536  
Heart CCAGGGCCCAAGGG**C**GAGAGGATCCTCCACCTACCTCTAAGGCTTCAAAAACAGACCA 499  
Brain CCAGGGCCCAAGGG**C**GAGAGGATCCTCCACCTACCTCTAAGGCTTCAAAAACAGACCA 499  
\*\*\*\*\*

Testis GAGAAATAGGATCCAGAGAGCAGGAATTC**A**TCACCCCTGCAGCTGATGAAATTAGAGC 558  
Ovary GAGAAATAGGATCCAGAGAGCAGGAATTC**A**TCACCCCTGCAGCTGATGAAATTAGAGC 558  
Spleen GAGAAATAGGATCCAGAGAGCAGGAATTC**A**TCACCCCTGCAGCTGATGAAATTAGAGC 563  
Liver GAGAAATAGGATCCAGAGAGCAGGAATTC**A**TCACCCCTGCAGCTGATGAAATTAGAGC 559  
Lung GAGAA**G**AGGATCCAGAGAGCAGGAATTC**A**TCACCCCTGCAGCTGATGAAATTAGAGC 596  
Heart GAGAAATAGGATCCAGAGAGCAGGAATTC**A**TCACCCCTGCAGCTGATGAAATTAGAGC 559  
Brain GAGAAATAGGATCCAGAGAGCAGGAATTC**A**TCACCCCTGCAGCTGATGAAATTAGAGC 559  
\*\*\*\*\*

Testis CTGCATGTGGATGTCAATCCAGGAAGGCAAGTGGAGAGTCCCATCCTGGGGACTCCCTTC 618  
Ovary CTGCATGTGGATGTCAATCCAGGAAGGCAAGTGGAGAGTCCCATCCTGGGGACTCCCTTC 618  
Spleen CTGCATGTGGATGTCAATCCAGGAAGGCAAGTGGAGAGTCCCATCCTGGGGACTCCCTTC 623  
Liver CTGCATGTGGATGTCAATCCAGGAAGGCAAGTGGAGAGTCCCATCCTGGGGACTCCCTTC 619  
Lung CT**G**C**T**G**T**G**G**A**T**G**T**C**A**A**T**C**C**A**G**G**A**A**G**G**C**A**A**G**T**G**G**A**G**A**G**T**C**C**C**A**T**C**C**T**G**G**G**G**A**C**T**C**C**T**T**C 656  
Heart CTGCATGTGGATGTCAATCCAGGAAGGCAAGTGGAGAGTCCCATCCTGGGGACTCCCTTC 619  
Brain CTGCATGTGGATGTCAATCCAGGAAGGCAAGTGGAGAGTCCCATCCTGGGGACTCCCTTC 619  
\*\*\*\*\*

Testis GGTTTCTTAGCAAGGTCCAAGGGAGGGAAC**T**ACCAAAGGTGGGCT**T**AGGAGAGGAGCCCA 678  
Ovary GGTTTCTTAGCAAGGTCCAAGGGAGGGAAC**T**ACCAAAGGTGGGCT**T**AGGAGAGGAGCCCA 678  
Spleen GGTTTCTTAGCAAGGTCCAAGGGAGGGAAC**T**ACCAAAGGTGGGCT**T**AGGAGAGGAGCCCA 683  
Liver GGTTTCTTAGCAAGGTCCAAGGGAGGGAAC**T**ACCAAAGGTGGGCT**T**AGGAGAGGAGCCCA 679  
Lung **A**GT**T**T**C**T**T**A**G**C**A**A**G**G**T**C**C**A**A**G**G**A**G**G**A**G**C**T**A**C**C**A**A**A**G**G**T**G**G**G**C**T**C**A**G**G**A**G**A**G**G**A**C**C**C**A 716  
Heart GGTTTCTTAGCAAGGTCCAAGGGAGGGAAC**T**ACCAAAGGTGGGCT**C**AG**G**A**T**AGGAGCCCA 679  
Brain GGTTTCTTAGCAAGGTCCAAGGGAGGGAAC**T**ACCAAAGGTGGGCT**T**AGGAGAGGAGCCCA 679  
\*\*\*\*\*

Testis CCTGGCCACAGTGGGTCTTCCCTCCCATGTTTCAGTACCAGAAACGTAAGGCAAGCGCGA 738  
Ovary CCTGGCCACAGTGGGTCTTCCCTCCCATGTTTCAGTACCAGAAACGTAAGGCAAGCGCGA 738  
Spleen CCTGGCCACAGTGGGTCTTCCCTCCCATGTTTCAGTACCAGAAACGTAAGGCAAGCGCGA 743  
Liver CCTGGCCACAGTGGGTCTTCCCTCCCATGTTTCAGTACCAGAAACGTAAGGCAAGCGCGA 739  
Lung CCTGGCC**C**AG**T**G**G**T**C**T**T**C**C**C**T**C**C**C**A**T**G**T**T**C**A**G**T**A**C**C**A**G**A**A**C**G**T**A**A**G**G**C**A**A**G**C**G**C**G**A 776  
Heart CCTGGCCACAGTGGG**C**CTTCCCTCCCATGTTTCAGTACCAGAAACGTAAGGCAAGCGCGA 739  
Brain CCTGGCCACAGTGGGTCTTCCCTCCCATGTTTCAGTACCAGAAACGTAAGGCAAGCGCGA 739  
\*\*\*\*\*

Testis TGAAAAAGAGAGTGAGCCAGGCATTCAAGCA**A**AGAAAGATTTATTATAGGAAGAAAGAAA 798  
Ovary TGAAAAAGAGAGTGAGCCAGGCATTCAAGCAGAGAAAGATTTATTATAGGAAGAAAGAAA 798  
Spleen TGAAAAAGAGAGTGAGCCAGGCATTCAAGCAGAGAAAGATTTATTATAGGAAGAAAGAAA 803  
Liver TGAAAAAGAGAGTGAGCCAGGCATTCAAGCAGAGAAAGATTTATTATAGGAAGAAAGAAA 799  
Lung TGAAAAAGAGAGTGAGCCAGGCATTCAAGCAGAGAAAGATTTATTATAGGAAGAAAGAAA 836

Heart TGAAAAAGAGAGTGAGCCAGGCATTCAAGCAGAGAAAGATTTATTATAGGAAGAAAGAAA 799  
Brain TGAAAAAGAGAGTGAGCCAGGCATTCAAGCAGAGAAAGATTTATTATAGGAAGAAAGAAA 799  
\*\*\*\*\*

Testis GAAA----TTGACTATAGAGAGAAACCAGTGCCTATTTTTTACAGCCAACCCTTCTTATA 854  
Ovary GAAA----TTGGCTATAGAGAGAAACCAGTGCCTATTTTTTACAGCCAACCCTTCTTATA 854  
Spleen GAAA----TTGGCTATAGAGAGAAACCAGTGCCTATTTTTTACAGCCAACCCTTCTTATA 859  
Liver GAAA----TTGGCTATAGAGAGAAACCAGTGCCTATTTTTTACAGCCAACCCTTCTTATA 855  
Lung GAAA**GTGACT**GGCTAT**TGAGAGAAACCAGTGCCTCTCTTTTTTACAGCCAACCCTTCTTATA** 896  
Heart GAAA----TTGGCTATAGAGAGAAACCAGTGCCTATTTTTTACAGCCAACCCTTCTTATA 855  
Brain GAAA----TTGGCTATAGAGAGAAACCAGTGCCTATTTTTTACAGCCAACCCTTCTTATA 855  
\*\*\* \*\* \*\*\*\*\*

Testis CCCTATCGATGGGAAATTGTGCCCTGGAGGAAGGGGGCTTCAGTTTATCTTTAGCCC**ACA** 914  
Ovary CCCTATCGATGGGAAATTGTGCCCTGGAGGAAGGGGGCTTCAGTTTATCTTTAGCCC**ACA** 914  
Spleen CCCTATCGATGGGAAATTGTGCCCTGGAGGAAGGGGGCTTCAGTTTATCTTTAGCCC**ACA** 919  
Liver CCCTATCGATGGGAAATTGTGCCCTGGAGGAAGGGGGCTTCAGTTTATCTTTAGCCC**ACA** 915  
Lung CCCTATCGATGGGAAATTGTGCCCTGGAGGAAGGGGGCTTCAGTTTATCTTTAGCCC**TGCA** 956  
Heart CCCTATCGATGGGAAATTGTGCCCTGGAGGAAGGGGGCTTCAGTTTATCTTTAGCCC**TCA** 915  
Brain CCCTATCGATGGGAAATTGTGCCCTGGAGGAAGGGGGCTTCAGTTTATCTTTAGCCC**ACA** 915  
\*\*\*\*\* \*\*

Testis GCTGGGGTCTTATGGTCACTTAGTCTGAAGGGGTCTCACAGTCGGGTGGTCACATAGTCTT 974  
Ovary GCTGGGGTCTTATGGTCACTTAGTCTGAAGGGGTCTCACAGTCGGGTGGTCACATAGTCTT 974  
Spleen GCTGGGGTCTTATGGTCACTTAGTCTGAAGGGGTCTCACAGTCGGGTGGTCACATAGTCTT 979  
Liver GCTGGGGTCTTATGGTCACTTAGTCTGAAGGGGTCTCACAGTCGGGTGGTCACATAGTCTT 975  
Lung GCTGGGGTCTTATGGTCACTTAGT**CA**AAGGG**GC**CTCACAGTCGGGTGGTCAC**G**TAGTCTT 1016  
Heart GCTGGGGTCTTATGGTCACTTAGT**TGA**AGGGGTCTCACAGTCGGGTGGTCACATAGTCTT 975  
Brain GCTGGGGTCTTATGGTCACTTAGTCTGAAGGGGTCTCACAGTCGGGTGGTCACATAGTCTT 975  
\*\*\*\*\* \*\*\*\*\*

Testis GAGAACTGGCACCAGCAGG-AAAAACAGGATATCGCCTTAAGGAAGGTACAGTCTGCC 1033  
Ovary GAGAACTGGCACCAGCAGG-AAAAACAGGATATCGCCTTAAGGAAGGTACAGTCTGCC 1033  
Spleen GAGAACTGGCACCAGCAGG-AAAAACAGGATATCGCCTTAAGGAAGGTACAGTCTGCC 1038  
Liver GAGAA**G**CTGGCACCAGCAGG-AAAAACAGGATATCGCCTTAAGGAAGGTACAGTCTGCC 1034  
Lung GAGAACTGGCACCAGCAGG**G**AAAAACAGGATATCGCCTTAAG**G**TAGGTACAGTCTGCC 1076  
Heart GAGAACT**G**ACACCAGCAGG-AAAAACAGGATAT**AC**CTTAAGGAAGGTACAGTCTGCC 1034  
Brain GAGAACTGGCACCAGCAGG-AAAAACAGGATATCGCCTTAAGGAAGGTACAGTCTGCC 1034  
\*\*\*\*\* \*\* \*\*\*\*\*

Testis ACCAGGGCAATGTGGCCACTGTGACTTCATCCCTTGTTTGTTCAGGT-ACCACAATGGG**TC** 1092  
Ovary ACCAGGGCAATGTGGCCACTGTGACTTCATCCCTTGTTTGTTCAGGT-ACCACAATGGG**TC** 1092  
Spleen ACCAGGGCAATGTGGCCACTGTGACTTCATCCCTTGTTTGTTCAGGT-ACCACAATGGG**TC** 1097  
Liver ACCAGGGCAATGTGGCCACTGTGACTTCATCCCTTGTTTGTTCAGGT-ACCACAATGGG**TC** 1093  
Lung **AT**CAGGGCAATGTGGCCACTGTGACTTCATCCCTTGTTTGTTCAGGT**CA**CCACA**G**TGG**CC** 1136  
Heart ACCAGGGCAATGTGGCCACTGTGACTTCATCCCTTGTTTGTTCAGGT-ACCACAATGGG**CC** 1093  
Brain ACCAGGGCAATGTGGCCACTGTGACTTCATCCCTTGTTTGTTCAGGT-ACCACAATGGG**TC** 1093  
\* \*\*\*\*\*

Testis ATATTTTAACAATACGCTATGAGCCCCTTGAGAACTGTAGCATGTGCAATGTTTTTCTAA 1152  
Ovary ATATTTTAACAATACGCTATGAGCCCCTTGAGAACTGTAGCATGTGCAATGTTTTTCTAA 1152  
Spleen ATATTTTAACAATACGCTATGAGCCCCTTGAGAACTGTAGCATGTGCAATGTTTTTCTAA 1157  
Liver ATATTTTAACAATACGCTATGAGCCCCTTGAGAACTGTAGCATGTGCAATGTTTTTCTAA 1153  
Lung ATATTTTAACAATACGCTATGAGCCCCTTGAGAACTGT**G**GCATGTGCAATGTTTTTCTAA 1196  
Heart ATATTTTAACAATAC**A**CTATGAGCCCCTTGAGAACTGTAGCATGTGCAATGTTTTTCTAA 1153  
Brain ATATTTTAACAATACGCTATGAGCCCCTTGAGAACTGTAGCATGTGCAATGTTTTTCTAA 1153  
\*\*\*\*\*

Testis GTTGGATCCCAT**CA**CAG**G**GACCTATACATACATGTTTACACTTATTATGGGGGGG-CCTC 1211  
Ovary GTTGGATCCCAT**CA**CAG**G**GACCTATACATACATGTTTACACTTATTATGGGGGGG-CCTC 1211  
Spleen GTTGGATCCCAT**CA**CAG**A**GACCTATACATACATGTTTACACTTATTATGGGGGGG-CCTC 1216  
Liver GTTGGATCCCAT**CA**CAG**A**GACCTATACATACATGTTTACACTTATTATGGGGGGG-CCTC 1212  
Lung GTTGGATCCCAT**TG**CAG**A**GGCCTAT**AG**GACATGTTTACACTTATTATGGGGGGG-CCTC 1255

Heart GTTGGATCCCATCGCAGAGGACTATACATACATGTTTCACACTTATTATGGGGGGG-CCTC 1212  
Brain GTTGGATCCCATCACAGAGACCTATACATACATGTTTCACACTTATTATGGGGGGGCGCCTC 1213  
\*\*\*\*\* \*\* \* \*\*\*\*\* \*\*\*\*\*

Testis CCTTTTTGACCTCCAAGAAGCCTTCTGCACATGTGCACACAGGGAAGTCTTCCTTAACC 1271  
Ovary CCTTTTTGACCTCCAAGAAGCCTTCTGCACATGTGCACACAGGGAAGTCTTCCTTAACC 1271  
Spleen CCTTTTTGACCTCCAAGAAGCCTTCTGCACATGTGCACACAGGGAAGTCTTCCTTAACC 1276  
Liver CCTTTTTGACCTCCAAGAAGCCTTCTGCACATGTGCACACAGGGAAGTCTTCCTTAACC 1272  
Lung CCTTTTTGACCTCCAAGAAGCCTTCTGACATGTGCACACAGGGAAGTCTTCCTTAACC 1315  
Heart CCTTTTTGACCTCCAAGAAGCCTTCTGCACATGTGCACACAGGGAAGTCTTCCTTAACC 1272  
Brain CCTTTTTGACCTCCAAGAAGCCTTCTGCACATGTGCACATAGGGAAGTCTTCCTTAACC 1273  
\*\*\*\*\* \*\*\*\*\*

Testis TCAGGAGTGGGCACCTTATCTCTGCTTCAGCAGAGCTCAACTTTTGCCACTAACTTTGTGTC 1331  
Ovary TCAGGAGTGGGCACCTTATCTCTGCTTCAGCAGAGCTCAACTTTTGCCACTAACTTTGTGTC 1331  
Spleen TCAGGAGTGGGCACCTTATCTCTGCTTCAGCAGAGCTCAACTTTTGCCACTAACTTTGTGTC 1336  
Liver TCAGGAGTGGGCACCTTATCTCTGCTTCAGCAGAGCTCAACTTTTGCCACTAACTTTGTGTC 1332  
Lung TCAGGAGTGGGCACCTTATCTCTGCTTCAGCAGAGCTCAACTTTTGCCACTAACTTTGTGTC 1375  
Heart CAGGAGTGGGCACCTTATCTCTGCTTCAGCAGAGCTCAACTTTTGCCACTAACTTTGTGTC 1332  
Brain TCAGGAGTGGGCACCTTATCTCTGCTTCAGCAGAGCTCAACTTTTGCCACTAACTTTGTGTC 1333  
\*\*\*\*\*

Testis CTTGGAATGAGAACAAGCTTGAATTTTATTCACCTGACAAATGCCACGTGTCCAGCCC 1391  
Ovary CTTGGAATGAGAACAAGCTTGAATTTTATTCACCTGACAAATGCCACGTGTCCAGCCC 1391  
Spleen CTTGGAATGAGAACAAGCTTGAATTTTATTCACCTGACAAATGCCACGTGTCCAGCCC 1396  
Liver CTTGGAATGAGAACAAGCTTGAATTTTATTCACCTGACAAATGCCACGTGTCCAGCCC 1392  
Lung CTTGAGTGAGAACAAGCTTGAATTTTATTCACCTGACAAATACCAGGTGTCCAGCCC 1435  
Heart CTTGGAATGAGAACAAGCTTGAATTTTATTCACCTGACAAATGCCACGTGTCCAGCCC 1392  
Brain CTTGGAATGAGAACAAGCTTGAATTTTATTCACCTGACAAATGCCACGTGTCCAGCCC 1393  
\*\*\* \*\* \*\*\*\*\*

Testis AGAGGCCACTGTTGCCTAC-TACCAGAACCAGGTCGGTACCCTTCTGGGGACCCAC 1450  
Ovary AGAGGCCACTGTTGCCTAC-TACCAGAACCAGGTCGGTACCCTTCTGGGGACCCAC 1450  
Spleen AGAGGCCACTGTTGCCTAC-TACCAGAACCAGGTCGGTACCCTTCTGGGGACCCAC 1455  
Liver AGAGGCCACTGTTGCCTAC-TACCAGAACCAGGTCGGTACCCTTCTGGGGACCCAC 1451  
Lung AGAGGCCACTGTTGCCTACCTCACTAGAAATCCGGTTCGGTACCCTTCTGGGGACCCAC 1495  
Heart AGAGGCCACTGTTGCCTAC-TACCAGAACCAGGTCGGTACCCTTCTGGGGACCCAC 1451  
Brain AGAGGCCACTGTTGCCTAC-TACCAGAACCAGGTCGGTACCCTTCTGGGGACCCAC 1452  
\*\*\*\*\*

Testis CCCTAACAGAAGCACAGGACCTGGAAAGGCAGGAGGGGCTGCAGCTTCAGGCTGACCTC 1510  
Ovary CCCTAACAGAAGCACAGGACCTGGAAAGGCAGGAGGGGCTGCAGCTTCAGGCTGACCTC 1510  
Spleen CCCTAACAGAAGCACAGGACCTGGAAAGGCAGGAGGGGCTGCAGCTTCAGGCTGACCTC 1515  
Liver CCCTAACAGAAGCACAGGACCTGGAAAGGCAGGAGGGGCTGCAGCTTCAGGCTGACCTC 1511  
Lung CCCTAACAGAAGCACAGGACCTGGAAAGGCAGGAGAGAGGCTGCAGCTTCAGGCTGACCTC 1555  
Heart CCCTAACAGAAGCACAGGACCTGGAAAGGCAGGAGGGGCTGCAGCTTCAGGCTGACCTC 1511  
Brain CCCTAACAGAAGCACAGGACCTGGAAAGGCAGGAGGGGCTGCAGCTTCAGGCTGACCTC 1512  
\*\*\*\*\*

Testis CCATCCCTGTGGCCTTAGGTGAAGCTGAGGCTCCTGCCACTGCCTTGTCTGTGGAGCAGC 1570  
Ovary CCATCCCTGTGGCCTTAGGTGAAGCTGAGGCTCCTGCCACTGCCTTGTCTGTGGAGCAGC 1570  
Spleen CCATCCCTGTGGCCTTAGGTGAAGCTGAGGCTCCTGCCACTGCCTTGTCTGTGGAGCAGC 1575  
Liver CCATCCCTGTGGCCTTAGGTGAAGCTGAGGCTCCTGCCACTGCCTTGTCTGTGGAGCAGC 1571  
Lung CCATCCCTGTGGCCTTAGGTGAAGCTGAGGCTCTGCCACTGCCTTGTCTGTGGAGCAGC 1615  
Heart CCATCCCTGTGGCCTTAGGTGAAGCTGAGGCTCCTGCCACTGCCTTGTCTGTGGAGCACA 1571  
Brain CCATCCCTGTGGCCTTAGGTGAAGCTGAGGCTCCTGCCACTGCCTTGTCTGTGGAGCAGC 1572  
\*\*\*\*\*

Testis GCTGCACAATGCCTTTTCTCTCTCCTGGAACGGTCATCGTTCTGCAGAGCTGGGTCCCC 1630  
Ovary GCTGCACAATGCCTTTTCTCTCTCCTGGAACGGTCATCGTTCTGCAGAGCTGGGTCCCC 1630  
Spleen GCTGCACAATGCCTTTTCTCTCTCCTGGAACGGTCATCGTTCTGCAGAGCTGGGTCCCC 1635  
Liver GCTGCACAATGCCTTTTCTCTCTCCTGGAACGGTCATCGTTCTGCAGAGCTGGGTCCCC 1631  
Lung GCTGTATGACGCCTTTTCTCTCTCCTGGAATGGTCATCGTTCTGCCAGCTGGGTCCCC 1675

Heart GCTGCACAATGCCTTTTCTCTCTCCTGGAAC TGGTCATCGTTCTGCAGAGCTGGGTCCCC 1631  
Brain GCTGCACAATGCCTTTTCTCTCTCCTGGAAC TGGTCATCGTTCTGCAGAGCTGGGTCCCC 1632  
\*\*\*\* \* \* \*\*\*\*\*

Testis TCAGCCAAGGAGGAGGGAAC TGTCTTGGTGGAGGAAGAAGATGAGTCTTTCTCATCCT 1690  
Ovary TCAGCCAAGGAGGAGGGAAC TGTCTTGGTGGAGGAAGAAGATGAGTCTTTCTCATCCT 1690  
Spleen TCAGCCAAGGAGGAGGGAAC TGTCTTGGTGGAGGAAGAAGATGAGTCTTTCTCATCCT 1695  
Liver TCAGCCAAGGAGGAGGGAAC TGTCTTGGTGGAGGAAGAAGATGAGTCTTTCTCATCCT 1691  
Lung TCAGCCAAGGAGGAGGGAAC C TGTCTTGGTGAAGGAAGAAGATGAGTCTTTCTCATCCT 1735  
Heart TCAGCCAAGGAGGAGGGAAC TGTCTTGGTGGAGGAAGAAGATGAGTCTTTCTCATCCT 1691  
Brain TCAGTCAAGGAGGAGGGAAC TGTCTTGGTGGAGGAAGAAGATGAGTCTTTCTCATCCT 1692  
\*\* \* \*\*\*\*\*

Testis TCCCTCAATCTTCTGAGCCAGGTGCTTGGGGCTTTGCCTGTTTCTTTCTTTCAGATGTGCG 1750  
Ovary TCCCTCAATCTTCTGAGCCAGGTGCTTGGGGCTTTGCCTGTTTCTTTCTTTCAGATGTGCG 1750  
Spleen TCCCTCAATCTTCTGAGCCAGGTGCTTGGGGCTTTGCCTGTTTCTTTCTTTCAGATGTGCG 1755  
Liver TCCCTCAATCTTCTGAGCCAGGTGCTTGGGGCTTTGCCTGTTTCTTTCTTTCAGATGTGCG 1751  
Lung TCCCTCAATCTTCTGAGCCAGGTGCTTGGGGCTTTGCCTGTTTCTTTCTTTCAGATGTGCG 1795  
Heart TCCCTC A TCTTCTGAGCCAGGTGCTTGGGGCTTTGCCTGTTTCTTTCTTTCAGATGTGCG 1751  
Brain TCCCTCAATCTTCTGAGCCAGGTGCTTGGGGCTTTGCCTGTTTCTTTCTTTCAGATGTGCG 1752  
\*\*\*\*\*

Testis TGTGTCTGTCTGTCTGT 1767  
Ovary TGTGTCTGTCTGTCTGT 1767  
Spleen TGTGTCTGTCTGTCTGT 1772  
Liver TGTGTCTGTCTGTCTGT 1768  
Lung TGTGTCTGTCTGTCTGT 1812  
Heart TGTGTCTGTCTGTCTGT 1768  
Brain TGTGTCTGTCTGTCTGT 1769  
\*\*\*\*\*
