# Supplementary material for: Organization and differential expression of the GACA/GATA tagged somatic and spermatozoal transcriptomes in Buffalo Bubalus bubalis
Source: PubMed Central journal article supplement (PMC2346481; doi:10.1186/1471-2164-9-132), 2008-03-20
Supplement: 1471-2164-9-132-S6.pdf [file 1471-2164-9-132-S6.pdf]

**Additional file 6: Multiple nucleotide sequence alignment of GACA-tagged 1.3 kb transcript originating from different tissues and spermatozoa of buffalo**

|              |                                                                     |            |
|--------------|---------------------------------------------------------------------|------------|
| <b>SPERM</b> | <b>ACAGACAGACAGACAGCAGTGTTCCTGTCCAGGCCGACCTGGAGGACCCACCTGGGGTG</b>  | <b>60</b>  |
| Testis       | ACAGACAGACAGACAGCAGTGTTCCTGTCCAGGCCGACCTGGAGGACCCACCTGGGGTG         | 60         |
| Ovary        | ACAGACAGACAGACAGCAGTGTTCCTGTCCAGGCCGACCTGGAGGACCCACCTGGGGTG         | 60         |
| Spleen       | ACAGACAGACAGACAGCAGTGTTCCTGTCCAGGCCGACCTGGAGGACCCACCTGGGGTG         | 60         |
| Liver        | ACAGACAGACAGACAGCAGTGTTCCTGTCCAGGCCAACCTGGAGGACCCACCTGGGGTG         | 60         |
| Kidney       | ACAGACAGACAGACAGCAGTGTTCCTGTCCAGGCCAACCTGGAGGACCCACCTGGGGTG         | 60         |
|              | *****                                                               |            |
| <b>SPERM</b> | <b>AATTTCCCTCACTTAGTCTTTGCTGCCGGGCTCGACTACCCGTCAGCCACTGTTGCTAG</b>  | <b>120</b> |
| Testis       | AATTTCCCTCACTTAGTCTTTGCTGCCGGGCTCGACTACCCATCAGCCACTGTTGCTAG         | 120        |
| Ovary        | AATTTCCCTCACTTAGTCTTTGCTGCCGGGCTCGACTACCCGTCAGCCACTGTTGCTAG         | 120        |
| Spleen       | AATTTCCCTCACTTAGTCTTTGCTGCCGGGCTCGACTACCCGTCAGCCACTGTTGCTAG         | 120        |
| Liver        | AATTTCCCTCACTTAGTCTTTGCTGCCGGGCTCGACTACCCGTCAGCCACTGTTGCTAG         | 120        |
| Kidney       | AATTTCCCTCACTTAGTCTTTGCTGCCGGGCTCGACTACCCGTCAGCCACTGTTGCTAG         | 120        |
|              | *****                                                               |            |
| <b>SPERM</b> | <b>TGAAAGTAAACACCCATACGGGCTACACCAAGGGCACCTGTTGATTACAGAGCTCGTAAA</b> | <b>180</b> |
| Testis       | TGAAAGTAAACACCCATACGGGCTACACCAAGGGCACCTGTTGATTACAGAGCTCGTAAA        | 180        |
| Ovary        | TGAAAGTAAACACCCATACGGGCTACACCAAGGGCACCTGTTGATTACAGAGCTCGTAAA        | 180        |
| Spleen       | TGAAAGTAAACACCCATACGGGCTACACCAAGGGCACCTGTTGATTACAGAGCTCGTAAA        | 180        |
| Liver        | TGAAAGTAAACACCCATACGGACTACACCAAGGGCACCTGTTGATTACAGAGCTCGTAAA        | 180        |
| Kidney       | TGAAAGTAAACACCCATACGGGCTACACCAAGGGCACCTGTTGATTACAGAGCTCGTAAA        | 180        |
|              | *****                                                               |            |
| <b>SPERM</b> | <b>ACCCAGGAGCCCAAGCCACTTTATGACGTGCCAGAATCCAGGGGCAGGAGCAAAGCCTG</b>  | <b>240</b> |
| Testis       | ACCCAGGAGCCCAAGCCACTTTATGACGTGCCAGAATCCAGGGGCAGGAGCAAAGCCTG         | 240        |
| Ovary        | ACCCAGGAGCCCAAGCCACTTTATGACGTGCCAGAATCCAGGGGCAGGAGCAAAGCCTG         | 240        |
| Spleen       | CCAGGAGCCCAAGCCACTTTATGACGTGCCAGAATCCAGGGGCAGGAGCAAAGCCTG           | 240        |
| Liver        | ACCCAGGAGCCCAAGCCACTTTATGACGTGCCAGAATCCAGGGGCAGGAGCAAAGCCTG         | 240        |
| Kidney       | ACCCAGGAGCCCAAGCCACTTTATGACGTGCCAGAATCCAGGGGCAGGAGCAAAGCCTG         | 240        |
|              | *****                                                               |            |
| <b>SPERM</b> | <b>GGGAAATCTCCCGGCTTCGAGGGCCACCGGATGCTTCAGCAGGAGCAGAGGGGCTGGCC</b>  | <b>300</b> |
| Testis       | GGGAAATCTCCCGGCTTCGAGGGCCACCGGATGCTTCAGCAGGAGCAGAGGGGCTGGCC         | 300        |
| Ovary        | GGGAAATCTCCCGGCTTCGAGGGCCACCGGATGCTTCAGCAGGAGCAGAGGGGCTGGCC         | 300        |
| Spleen       | GGGAAATCTCCCGGCTTCGAGGGCCACCGGATGCTTCAGCAGGAGCAGAGGGGCTGGCC         | 300        |
| Liver        | GGGAAATCTCCCGGCTTCGAGGGCCACCGGATGCTTCAGCAGGAGCAGAGGGGCTGGCC         | 300        |
| Kidney       | GGGAAATCTCCCGGCTTCGAGGGCCACCGGATGCTTCAGCAGGAGCAGAGGGGCTGGCC         | 300        |
|              | *****                                                               |            |
| <b>SPERM</b> | <b>TCCGCCCACAGGTGAGATGTGGCCGTGGGCTTAGCTTTAAGCTGCTGACCCGCAGCGGC</b>  | <b>360</b> |
| Testis       | TCCGCCCACAGGTGAGATGTGGCCGTGGGCTTAGCTTTAAGCTGCTGACCCGCAGCGGC         | 360        |
| Ovary        | TCCGCCCACAGGTGAGATGTAGCCGTGGGCTTAGCTTTAAGCTGCTGACCCGCAGCGGC         | 360        |
| Spleen       | TCCGCCCACAGGTGAGATGTAGCCGTGGGCTTAGCTTTAAGCTGCTGACCCGCAGCGGC         | 360        |
| Liver        | TCCGCCCACAGGTGAGATGTGGCCGTGGGCTTAGCTTTAAGCTGCTGACCCGCAGCGGC         | 360        |
| Kidney       | TCCGCCCACAGGTGAGATGTGGCCGTGGGCTTAGCTTTAAGCTGCTGACCCGCAGCGGC         | 360        |
|              | *****                                                               |            |
| <b>SPERM</b> | <b>TTGCTTAGACCACTCTGGGGCTTGGGGGCTTGGGGGGCTGGCCCCGCTGATGGTTGAAGA</b> | <b>420</b> |
| Testis       | TTGCTTAGACCACTCTGGGGCTTGGGGGCTTGGGGGGCTGGCCCCGCTGATGGTTGAAGA        | 420        |
| Ovary        | TTGCTTAGACCACTCTGGGGCTTGGGGGCTTGGGGGGCTGGCCCCGCTGATGGTTGAAGA        | 420        |
| Spleen       | TTGCTTAGACCACTCTGGGGCTTGGGGGCTTGGGGGGCTGGCCCCGCTGATGGTTGAAGA        | 420        |
| Liver        | TTGCTTAGACCACTCTGGGGCTTGGGGGCTTGGGGGGCTGGCCCCGCTGATGGTTGAAGA        | 420        |
| Kidney       | TTGCTTAGACCACTCTGGGGCTTGGGGGCTTGGGGGGCTGGCCCCGCTGATGGTTGAAGA        | 420        |
|              | *****                                                               |            |
| <b>SPERM</b> | <b>GCCAAACGGGACTTGGTGGGGGCCGTCGGGGTGGTGGTGCAGGCCCTGAGAGGCCAGTG</b>  | <b>480</b> |
| Testis       | GCCAAACGGGACTTGGTGGGGGCCGTCGGGGTGGTGGTGCAGGCCCTGAGAGGCCAGTG         | 480        |
| Ovary        | GCCAAACGGGACTTGGTGGGGGCCGTCGGGGTGGTGGTGCAGGCCCTGAGAGGCCAGTG         | 480        |
| Spleen       | GCCAAACGGGACTTGGTGGGGGCCGTCGGGGTGGTGGTGCAGGCCCTGAGAGGCCAGTG         | 480        |
| Liver        | GCCAAACGGGACTTGGTGGGGGCCGTCGGGGTGGTGGTGCAGGCCCTGAGAGGCCAGTG         | 480        |
| Kidney       | GCCAAACGGGACTTGGTGGGGGCCGTCGGGGTGGTGGTGCAGGCCCTGAGAGGCCAGTG         | 480        |
|              | *****                                                               |            |

SPERM GGCTTGCGGGGAGCCCTGCCTCTGTGACGGTGTACACCCAGTGAGCAGCCCTCAGAGAGG 540  
Testis GGCTTGCGGGGAGCCCTGCCTCTGTGACGGTGTACACCCAGTGAGTAGCCCTCAGAGAGG 540  
Ovary GGCTTGCGGGGAGCCCTGCCTCTGTGACGGTGTACACCCAGTGAGTAGCCCTCAGAGAGG 540  
Spleen GGCTTGCGGGGAGCCCTGCCTCTGTGACGGTGTACACCCAGTGAGTAGCCCTCAGAGAGG 540  
Liver GGCTTGCGGGGAGCCCTGCCTCTGTGACGGTGTACACCCAGTGAGTAGCCCTCAGAGAGG 540  
Kidney GGCTTGCGGGGAGCCCTGCCTCTGTGACGGTGTACACCCAGTGAGTAGCCCTCAGAGAGG 540  
\*\*\*\*\*

SPERM GAGAAGGAAGTGGACCCCGGGAGGGCACTTTTGGTTGCTGTTTGCCCTCTCCTCAATTTCC 600  
Testis GAGAAGGAAGTGGACCCCGGGAGGGCACTTTTGGTTGCTGTTTGCCCTCTCCTCAATTTCC 600  
Ovary GAGAAGGAAGTGGACCCCGGGAGGGCACTTTTGGTTGCTGTTTGCCCTCTCCTCAATTTCC 600  
Spleen GAGAAGGAAGTGGACCCCGGGAGGGCACTTTTGGTTGCTGTTTGCCCTCTCCTCAATTTCC 600  
Liver GAGAAGGAAGTGGACCCCGGGAGGGCACTTTTGGTTGCTGTTTGCCCTCTCCTCAATTTCC 600  
Kidney GAGAAGGAAGTGGACCCCGGGAGGGCACTTTTGGTTGCTGTTTGCCCTCTCCTCAATTTCC 600  
\*\*\*\*\*

SPERM TCTTTCAGAGGCTAATTTGGGATTCGTTTGTCTTTGCTTCTGGGCTCTCTGAGGGTGCAGGG 660  
Testis TCTTTCAGAGGCTAATTTGGGATTCGTTTGTCTTTGCTTCTGGGCTCTCTGAGGGTGCAGGG 660  
Ovary TCTTTCAGAGGCTAATTTGGGATTCGTTTGTCTTTGCTTCTGGGCTCTCTGAGGGTGCAGGG 660  
Spleen TCTTTCAGAGGCTAATTTGGGATTCGTTTGTCTTTGCTTCTGGGCTCTCTGAGGGTGCAGGG 660  
Liver TCTTTCAGAGGCTAATTTGGGATTCGTTTGTCTTTGCTTCTGGGCTCTCTGAGGGTGCAGGG 660  
Kidney TCTTTCAGAGGCTAATTTGGGATTCGTTTGTCTTTGCTTCTGGGCTCTCTGAGGGTGCAGGG 660  
\*\*\*\*\*

SPERM CCTCCCCTGGAGGAGGTCCCTTGGTCCCTCAGGTGGCCTTTTAAGCGTGGTAAGCGTGGG 720  
Testis CCTCCCCTGGAGGAGGTCCCTTGGTCCCTCAGGTGGCCTTTTAAGTGT-----GGG 710  
Ovary CCTCCCCTGGAGGAGGTCCCTTGGTCCCTCAGGTGGCCTTTTAAGTGT-----GGG 710  
Spleen CCTCCCCTGGAGGAGGTCCCTTGGTCCCTCAGGTGGCCTTTTAAGTGT-----GGG 710  
Liver CCTCCCCTGGAGGAGGTCCCTTGGTCCCTCAGGTGGCCTTTTAAGTGT-----GGG 710  
Kidney CCTCCCCTGGAGGAGGTCCCTTGGTCCCTCAGGTGGCCTTTTAAGTGT-----GGG 710  
\*\*\*\*\*

SPERM GCTTGGCTCTCAAGCAGAGCATGTGCAACAAGTCACCTGAAAAGATTGTAAGAATGCAAA 780  
Testis GCTTGGCTCTCAAGCAGAGCATGTGCAACAAGTCACCTGAAAAGATTGTAAGAATGCAAA 770  
Ovary GCTTGGCTCTCAAGCAGAGCATGTGCAACAAGTCACCTGAAAAGATTGTAAGAATGCAAA 770  
Spleen GCTTGGCTCTCAAGCAGAGCATGTGCAACAAGTCACCTGAAAAGATTGTAAGAATGCAAA 770  
Liver GCTTGGCTCTCAAGCAGAGCATGTGCAACAAGTCACCTGAAAAGATTGTAAGAATGCAAA 770  
Kidney GCTTGGCTCTCAAGCAGAGCATGTGCAACAAGTCACCTGAAAAGATTGTAAGAATGCAAA 770  
\*\*\*\*\*

SPERM TGTCCAGCCTCCTCCAAGAGACGGCGGGGCCAGGCTTAGGGGCGTGGCCTGGGTGGCTG 840  
Testis TGTCCAGCCTCCTCCAAGAGACGGCGGGGCCAGGCTTAGGGGCGTGGCCTGGGTGGCTG 830  
Ovary TGTCCAGCCTCCTCCAAGAGACGGCGGGGCCAGGCTTAGGGGCGTGGCCTGGGTGGCTG 830  
Spleen TGTCCAGCCTCCTCCAAGAGACGGCGGGGCCAGGCTTAGGGGCGTGGCCTGGGTGGCTG 830  
Liver TGTCCAGCCTCCTCCAAGAGACGGCGGGGCCAGGCTTAGGGGCGTGGCCTGGGTGGCTG 830  
Kidney TGTCCAGCCTCCTCCAAGAGACGGCGGGGCCAGGCTTAGGGGCGTGGCCTGGGTGGCTG 830  
\*\*\*\*\*

SPERM CATTTTTATTAAGCGCCTCCCCAACCCAGGTGACCTGGGAACCCCACTTTGAAAAATGCT 900  
Testis CATTTTTATTAAGCGCCTCCCCAACCCAGGTGACCTGGGAACCCCACTTTGAAAAATGCT 890  
Ovary CATTTTTATTAAGCGCCTCCCCAACCCAGGTGACCTGGGAACCCCACTTTGAAAAATGCT 890  
Spleen CATTTTTATTAAGCGCCTCCCCAACCCAGGTGACCTGGGAACCCCACTTTGAAAAATGCT 890  
Liver CATTTTTATTAAGCGCCTCCCCAACCCAGGTGACCTGGGAACCCCACTTTGAAAAATGCT 890  
Kidney CATTTTTATTAAGCGCCTCCCCAACCCAGGTGACCTGGGAACCCCACTTTGAAAAATGCT 890  
\*\*\*\*\*

SPERM GGGGCTCAGGGCCAAGACACCTGGGTTTGGGGTCGGGATCCAGCAGGAACCGCGCCGATG 960  
Testis GGGGCTCAGGGCCAAGACACCTGGGTTTGGGGTCGGGATCCAGCAGGAACCGCGCCGATG 950  
Ovary GGGGCTCAGGGCCAAGACACCTGGGTTTGGGGTCGGGATCCAGCAGGAACCGCGCCGATG 950  
Spleen GGGGCTCAGGGCCAAGACACCTGGGTTTGGGGTCGGGATCCAGCAGGAACCGCGCCGATG 950  
Liver GGGGCTCAGGGCCAAGACACCTGGGTTTGGGGTCGGGATCCAGCAGGAACCGCGCCGATG 950  
Kidney GGGGCTCAGGGCCAAGACACCTGGGTTTGGGGTCGGGATCCAGCAGGAACCGCGCCGATG 950  
\*\*\*\*\*

SPERM AGCGCGGTACTGCGTGTAACACGCGGACACAGTTCGAGGTATCGGTTGACACAGGGCAA 1020  
Testis AGCGCGGTACTGCGTGTAACACGCGGACACAGTTCGAGGTATCGGTTGACACAGGGCAA 1010  
Ovary AGCGCGGTACTGCGTGTAACACGCGGACACAGTTCGAGGTATCGGTTGACACAGGGCAA 1010  
Spleen AGCGCGGTACTGCGTGTAACACGCGGACACAGTTCGAGGTATCGGTTGACACAGGGCAA 1010  
Liver AGCGCGGTACTGCGTGTAACACGCGGACACAGTTCGAGGTATCGGTTGACACAGGGCAA 1010  
Kidney AGCGCGGTACTGCGTGTAACACGCGGACACAGTTCGAGGTATCGGTTGACACAGGGCAA 1010  
\*\*\*\*\*

SPERM CCGCCCCAGGAACTGCAGCGCATCCTGTTGTTGCTTTCCAGCCGGGATTTATTAAATC 1080  
Testis CCGCCCCAGGAACTGCAGCGCATCCTGTTGTTGCTTTCCAGCCGGGATTTATTAAATC 1070  
Ovary CCGCCCCAGGAACTGCAGCGCATCCTGTTGTTGCTTTCCAGCCGGGATTTATTAAATC 1070  
Spleen CCGCCCCAGGAACTGCAGCGCATCCTGTTGTTGCTTTCCAGCCGGGATTTATTAAATC 1070  
Liver CCGCCCCAGGAACTGCAGCGCATCCTGTTGTTGCTTTCCAGCCGGGATTTATTAAATC 1070  
Kidney CCGCCCCAGGAACTGCAGCGCATCCTGTTGTTGCTTTCCAGCCGGGATTTATTAAATC 1070  
\*\*\*\*\*

SPERM AAATATGCTTCTGTGAATTCTCCCATTTAACCCCTCAAACAGCCTGTGGCATGCGTCTGC 1140  
Testis AAATATGCTTCTGTGAATTCTCCCATTTAACCCCTCAAACAGCCTGTGGCATGCGTCTGC 1130  
Ovary AAATATGCTTCTGTGAATTCTCCCATTTAACCCCTCAAACAGCCTGTGGCATGCGTCTGC 1130  
Spleen AAATATGCTTCTGTGAATTCTCCCATTTAACCCCTCAAACAGCCTGTGGCATGCGTCTGC 1130  
Liver AAATATGCTTCTGTGAATTCTCCCATTTAACCCCTCAAACAGCCTGTGGCATGCGTCTGC 1130  
Kidney AAATATGCTTCTGTGAATTCTCCCATTTAACCCCTCAAACAGCCTGTGGCATGCGTCTGC 1130  
\*\*\*\*\*

SPERM CGATGGCCCCGTTTTTCCGATTTGGCAAAGTGAGGTTTCGAGTCGGGAAGCCCCCTAAAG 1200  
Testis CGATGGCCCCGTTTTTCCGATTTGGCAAAGTGAGGTTTCGAGTCGGGAAGCCCCCTAAAG 1190  
Ovary CGATGGCCCCGTTTTTCCGATTTGGCAAAGTGAGGTTTCGAGTCGGGAAGCCCCCTAAAG 1190  
Spleen CGATGGCCCCGTTTTTCCGATTTGGCAAAGTGAGGTTTCGAGTCGGGAAGCCCCCTAAAG 1190  
Liver CGATGGCCCCGTTTTTCCGATTTGGCAAAGTGAGGTTTCGAGTCGGGAAGCCCCCTAAAG 1190  
Kidney CGATGGCCCCGTTTTTCCGATTTGGCAAAGTGAGGTTTCGAGTCGGGAAGCCCCCTAAAG 1190  
\*\*\*\*\*

SPERM GGTACCTGGTGGGGACTTGAGCTGAGACCGAGGACGGTCCCACGCGGCAGCCTCACCCG 1260  
Testis GGTACCTGGTGGGGACTTGAGCTGAGACCGAGGACGGTCCCACGCGGCAGCCTCACCCG 1250  
Ovary GGTACCTGGTGGGGACTTGAGCTGAGACCGAGGACGGTCCCACGCGGCAGCCTCACCCG 1250  
Spleen GGTACCTGGTGGGGACTTGAGCTGAGACCGAGGACGGTCCCACGCGGCAGCCTCACCCG 1250  
Liver GGTACCTGGTGGGGACTTGAGCTGAGACCGAGGACGGTCCCACGCGGCAGCCTCACCCG 1250  
Kidney GGTACCTGGTGGGGACTTGAGCTGAGACCGAGGACGGTCCCACGCGGCAGCCTCACCCG 1250  
\*\*\*\*\*

SPERM GGCAGGGGCTGCCCTCCATGGAGCCGAGTTCTGAGCATGTCTGTCTGTCTGT 1313  
Testis GGCAGGGGCTGCCCTCCATGGAGCCGAGTTCTGAGCATGTCTGTCTGTCTGT 1303  
Ovary GGCAGGGGCTGCCCTCCATGGAGCCGAGTTCTGAGCATGTCTGTCTGTCTGT 1303  
Spleen GGCAGGGGCTGCCCTCCATGGAGCCGAGTTCTGAGCATGTCTGTCTGTCTGT 1303  
Liver GGCAGGGGCTGCCCTCCATGGAGCCGAGTTCTGAGCATGTCTGTCTGTCTGT 1303  
Kidney GGCAGGGGCTGCCCTCCATGGAGCCGAGTTCTGAGCATGTCTGTCTGTCTGT 1303  
\*\*\*\*\*
