# Supplementary material for: Organization and differential expression of the GACA/GATA tagged somatic and spermatozoal transcriptomes in Buffalo Bubalus bubalis
Source: PubMed Central journal article supplement (PMC2346481; doi:10.1186/1471-2164-9-132), 2008-03-20
Supplement: 1471-2164-9-132-S7.pdf [file 1471-2164-9-132-S7.pdf]

Heart GGGAGAGGGGACGGGCCCTGGCATGTACGTCAGGTTGCTGGTCCGCCTCCAAACACCGTA 350  
\*\*\*\*\*

**SPERM** CTCCAGAGCCGGCTCCCAGTCTCCTGCAGGGCTGTGTGGGAAGCAGGAAGGCAGGCAGGGGG 418  
Testis CTCCAGAGCCGGCTCCCAGTCTCCTGCAGGGCTGTGTGGGAAGCAGGAAGGCAGGCAGGGGG 410  
Ovary CTCCAGAGCCGGCTCCCAGTCTCCTGCAGGGCTGTGTGGGAAGCAGGAAGGCAGGCAGGGGG 410  
Spleen CTCCAGAGCCGGCTCCCAGTCTCCTGCAGGGCTGTGTGGGAAGCAGGAAGGCAGGCAGGGGG 412  
Liver CTCCAGAGCCGGCTCCCAGTCTCCTGCAGGGCTGTGTGGGAAGCAGGAAGGCAGGCAGGGGG 410  
Lung CTCCAGAGCCGGCTCCCAGTCTCCTGCAGGGCTGTGTGGGAAGCAGGAAGGCAGGCAGGGGG 420  
Kidney CTCCAGAGCCGGCTCCCAGTCTCCTGCAGGGCTGTGTGGGAAGCAGGAAGGCAGGCAGGGGG 410  
HEART CTCCAGAGCCGGCTCCCAGTCTCCTGCAGGACTGTGTGGGAAGCAGGAAGGCAGGCAGGGGG 410  
\*\*\*\*\*

**SPERM** CTGAGCATGCAGCCTGTAGTCTCTCTCCAGCCCCGTTTTGATCGGCAGAGGGGACCTGC 478  
Testis CTGAGCATGCAGCCTGTAGTCTCTCTCCAGCCCCGTTTTGATCGGCAGAGGGGACCTGC 470  
Ovary CTGAGCATGCAGCCTGTAGTCTCTCTCCAGCCCCGTTTTGATCGGCAGAGGGGACCTGC 470  
Spleen CTGAGCATGCAGCCTGTAGTCTCTCTCCAGCCCCGTTTTGATCGGCAGAGGGGACCTGC 472  
Liver CTGAGCATGCAGCCTGTAGTCTCTCTCCAGCCCCGTTTTGATCGGCAGAGGGGACCTGC 470  
Lung CTGAGCATGCAGCCTGTAGTCTCTCTCCAGCCCCGTTTTGATCGGCAGAGGGGACCTGC 480  
Kidney CTGAGCATGCAGCCTGTAGTCTCTCTCCAGCCCCGTTTTGATCGGCAGAGGGGACCTGC 470  
Heart CTGAGCATGCAGCCTGTAGTCTCTCTCCAGCCCCGTTTTGATCGGCAGAGGGGACCTGC 470  
\*\*\* \*\*\*\*\*

**SPERM** CTTTAGACAGCTGCCTGCACGACCCCTGCCACAGGGGTGCACACGGAGTACCCCTAGCC 538  
Testis CTTTAGACAGCTGCCTGCACGACCCCTGCCACAGGGGTGCACACGGAGTACCCCTAGCC 530  
Ovary CTTTAGACAGCTGCCTGCACGACCCCTGCCACAGGGGTGCACACGGAGTACCCCTAGCC 530  
Spleen CTTTAGACAGCTGCCTGCACGACCCCTGCCACAGGGGTGCACACGGAGTACCCCTAGCC 532  
Liver CTTTAGACAGCTGCCTGCACGACCCCTGCCACAGGGGTGCACACGGAGTACCCCTAGCC 530  
Lung CTTTAGACAGCTGCCTGCACGACCCCTGCCACAGGGGTGCACACGGAGTACCCCTAGCC 540  
Kidney CTTTAGACAGCTGCCTGCACGACCCCTGCCACAGGGGTGCACACGGAGTACCCCTAGCC 530  
Heart CTTTAGACAGCTGCCTGCACGACCCCTGCCACAGGGGTGCACACGGAGTACCCCTAGCC 530  
\*\*\*\*\*

**SPERM** TTGGGCAACCAACAGCAGGCCAGGGACACAGAGCTCATGGCCAGCGGGGAAGGGAGAAA 598  
Testis TTGGGCAACCAACAGCAGGCCAGGGACACAGAGCTCATGGCCAGCGGGGAAGGGAGAAA 590  
Ovary TTGGGCAACCAACAGCAGGCCAGGGACACAGAGCTCATGGCCAGCGGGGAAGGGAGAAA 590  
Spleen TTGGGCAACCAACAGCAGGCCAGGGACACAGAGCTCATGGCCAGCGGGGAAGGGAGAAA 592  
Liver TTGGGCAACCAACAGCAGGCCAGGGACACAGAGCTCATGGCCAGCGGGGAAGGGAGAAA 590  
Lung TTGGGCAACCAACAGCAGGCCAGGGACACAGAGCTCATGGCCAGCGGGGAAGGGAGAAA 600  
Kidney TTGGGCAACCAACAGCAGGCCAGGGACACAGAGCTCATGGCCAGCGGGGAAGGGAGAAA 590  
Heart TTGGGCAACCAACAGCAGGCCAGGGACACAGAGCTCATGGCCAGCGGGGAAGGGAGAAA 590  
\*\*\*\*\*

**SPERM** GAGACAGCAGACAGCGGCGGCAGCTCTCCTGGGTGTTATTTAACTGGTTTGTCTTGGG 658  
Testis GAGACAGCAGACAGCGGCGGCAGCTCTCCTGGGTGTTATTTAACTGGTTTGTCTTGGG 650  
Ovary GAGACAGCAGACAGCGGCGGCAGCTCTCCTGGGTGTTATTTAACTGGTTTGTCTTGGG 650  
Spleen GAGACAGCAGACAGCGGCGGCAGCTCTCCTGGGTGTTATTTAACTGGTTTGTCTTGGG 652  
Liver GAGACAGCAGACAGCGGCGGCAGCTCTCCTGGGTGTTATTTAACTGGTTTGTCTTGGG 650  
Lung GAGACAGCAGACAGCGGCGGCAGCTCTCCTGGGTGTTATTTAACTGGTTTGTCTTGGG 660  
Kidney GAGACAGCAGACAGCGGCGGCAGCTCTCCTGGGTGTTATTTAACTGGTTTGTCTTGGG 650  
Heart GAGACAGCAGACAGCGGCGGCAGCTCTCCTGGGTGTTATTTAACTGGTTTGTCTTGGG 650  
\*\*\*\*\*

**SPERM** GCAAATGGCTGCACTGAATGGACTACTAGCCCGTCTGGGCAGATTCCCTGTTTATTTTGG 718  
Testis GCAAATGGCTGCACTGAATGGACTACTAGCCCGTCTGGGCAGATTCCCTGTTTATTTTGG 710  
Ovary GCAAATGGCTGCACTGAATGGACTACTAGCCCGTCTGGGCAGATTCCCTGTTTATTTTGG 710  
Spleen GCAAATGGCTGCACTGAATGGACTACTAGCCCGTCTGGGCAGATTCCCTGTTTATTTTGG 712  
Liver GCAAATGGCTGCACTGAATGGACTACTAGCCCGTCTGGGCAGATTCCCTGTTTATTTTGG 710  
Lung GCAAATGGCTGCACTGAATGGACTACTAGCCCGTCTGGGCAGATTCCCTGTTTATTTTGG 720  
Kidney GCAAATGGCTGCACTGAATGGACTACTAGCCCGTCTGGGCAGATTCCCTGTTTATTTTGG 710  
Heart GCAAATGGCTGCACTGAATGGACTACTAGCCCGTCTGGGCAGATTCCCTGTTTATTTTGG 710  
\*\*\*\*\*

**SPERM** GCCTCAGTTGGCAGGGAAACAGCAGGTATGGCTCAGAGACACTCCTCTGCAATCAGAAG 778

Testis GCCTCAGTTGGCAGGGAAACAGCAGGTCATGGCTCAGAGACACTCCTCTGCAATCAGAAG 770  
Ovary GCCTCAGTTGGCAGGGAAACAGCAGGTCATGGCTCAGAGACACTCCTCTGCAATCAGAAG 770  
Spleen GCCTCAGTTGGCAGGGAAACAGCAGGTCATGGCTCAGAGACACTCCTCTGCAATCAGAAG 772  
Liver GCCTCAGTTGGCAGGGAAACAGCAGGTCATGGCTCAGAGACACTCCTCTGCAATCAGAAG 770  
Lung GCCTCAGTTGGCAGGGAAACAGCAGGTCATGGCTCAGAGACACTCCTCTGCAATCAGAAG 780  
Kidney GCCTCAGTTGGCAGGGAAACAGCAGGTCATGGCTCAGAGACACTCCTCTGCAATCAGAAG 770  
Heart GCCTCAGTTGGCAGGGAAACAGCAGGTCATGGCTCAGAGACACTCCTCTGCAATCAGAAG 770

\*\*\*\*\*

**SPERM** ACTGCTGGATGAAAAGGAATCCTTTTCTGTTCTGACTTCTGGCATCTCTGCACAGGGTGT 838

Testis ACTGCTGGATGAAAAGGAATCCTTTTCTGTTCTGACTTCTGGCATCTCTGCACAGGGTGT 830  
Ovary ACTGCTGGATGAAAAGGAATCCTTTTCTGTTCTGACTTCTGGCATCTCTGCACAGGGTGT 830  
Spleen ACTGCTGGATGAAAAGGAATCCTTTTCTGTTCTGACTTCTGGCATCTCTGCACAGGGTGT 832  
Liver ACTGCTGGATGAAAAGGAATCCTTTTCTGTTCTGACTTCTGGCATCTCTGCACAGGGTGT 830  
Lung ACTGCTGGATGAAAAGGAATCCTTTTCTGTTCTGACTTCTGGCATCTCTGCACAGGGTGT 840  
Kidney ACTGCTGGATGAAAAGGAATCCTTTTCTGTTCTGACTTCTGGCATCTCTGCACAGGGTGT 830  
Heart ACTGCTGGATGAAAAGGAATCCTTTTCTGTTCTGACTTCTGGCATCTCTGCACAGGGTGT 830

\*\*\* \*\*\*\*\*

**SPERM** AGATGTCTGTCTGTCTGT 857

Testis AGATGTCTGTCTGTCTGT 848  
Ovary AGATGTCTGTCTGTCTGT 848  
Spleen AGATGTCTGTCTGTCTGT 850  
Liver AGATGTCTGTCTGTCTGT 848  
Lung AGATGTCTGTCTGTCTGT 858  
Kidney AGATGTCTGTCTGTCTGT 848  
Heart AGATGTCTGTCTGTCTGT 848

\*\*\*\*\*
