# Supplementary material for: Organization and differential expression of the GACA/GATA tagged somatic and spermatozoal transcriptomes in Buffalo Bubalus bubalis
Source: PubMed Central journal article supplement (PMC2346481; doi:10.1186/1471-2164-9-132), 2008-03-20
Supplement: 1471-2164-9-132-S8.pdf [file 1471-2164-9-132-S8.pdf]

**Additional file 8: Multiple alignment of GACA-tagged 635 bp transcript originating from spermatozoa and different tissues of buffalo**

**SPERM** ACAGACAGACAGACACATCACTTGGGA-CAAAAAAACCAAAGCAAAGCCAGAGGTCATT 59  
 Testis ACAGACAGACAGACACATCACTTGGGGGCAAAAAAACCAAAGCAAAGCCAGAGGTCATT 60  
 Ovary ACAGACAGACAGACACATCACTTGGGA-CAAAAAAACCAAAGCAAAGCCAGAGGTCATT 59  
 Spleen ACAGACAGACAGACACATCACTTGGGA-CAAAAAAACCAAAGCAAAGCCAGAGGTCATT 59  
 Liver ACAGACAGACAGACACATCACTTGGGA-CAAAAAAACCAAAGCAAAGCCAGAGGTCATT 59  
 Kidney ACAGACAGACAGACACATCACTTGGGA-CAAAAAAACCAAAGCAAAGCCAGAGGTCATT 59  
 Heart ACAGACAGACAGACACATCACTTGGGA-CAAAAAAACCAAAGCAAAGCCAGAGGTCATT 59  
 \*\*\*\*\*

**SPERM** A-TCGT-ATCCTGAAGAA-CTAGGAGGGAGAAAACAGCTCAGTGGG-TCACGGGAAGGCTA 115  
 Testis AATCGTATCCTGA AAAA A CTAGGAGGGAGAA-CAGCTCAGTGGGTCACGGGAAGGCTA 119  
 Ovary A-TCGT-ATCCTGAAGAA-CTAGGAGGGAGAAAACAGCTCAGTGGG-TCACGGGAAGGCTA 115  
 Spleen A-TCGT-ATCCTGAAGAA-CTAGGAGGGAGAAAACAGCTCAGTGGG-TCACGGGAAGGCTA 115  
 Liver A-TCGT-ATCCTGAAGAA-CTAGGAGGGAGAAAACAGCTCAGTGGG-TCACGGGAAGGCTA 115  
 Kidney A-TCGT-ATCCTGAAGAA-CTAGGAGGGAGAAAACAGCTCAGTGGG-TCACGGGAAGGCTA 115  
 Heart A-TCGT-ATCCTGAAGAA-CTAGGAGGGAGAAAACAGCTCAGTGGG-TCACGGGAAGGCTA 115  
 \* \*\*\*\* \*\*\*\*\* \*\* \*\*\*\*\* \*\*\*\*\* \*\*\*\*\* \*\*\*\*\* \*\*\*\*\*

**SPERM** GGATAGGATGGACTGGCCCCCTGTGCGCCCCCTGCGCACAGCAGACATACTAGGCAGAGCGG 175  
 Testis GGATAGGATG-ACTGGCCC-TGTGC-CCCCTGCGCACAGCAGACATACTAGCAGAGCGC 176  
 Ovary GGATAGGATGGACTGGCCCCCTGTGCGCCCCCTGCGCACAGCAGACATACTAGGCAGAGCGG 175  
 Spleen GGATAGGATGGACTGGCCCCCTGTGCGCCCCCTGCGCACAGCAGACATACTAGGCAGAGCGG 175  
 Liver GGATAGGATGGACTGGCCCCCTGTGCGCCCCCTGCGCACAGCAGACATACTAGGCAGAGCGG 175  
 Kidney GGATAGGATGGACTGGCCCCCTGTGCGCCCCCTGCGCACAGCAGACATACTAGGCAGAGCGG 175  
 Heart GGATAGGATGGACTGGCCCCCTGTGCGCCCCCTGCGCACAGCAGACATACTAGGCAGAGCGG 175  
 \*\*\*\*\*

**SPERM** CAGCCCTGGGTTTCAGTTCTGACTCTGCTGTGTTACTCTGG-AGCAGTTGCTGCCCTCC 234  
 Testis AGCCCTGGGTTTCAGTTCTGACTCTGCTGTGTTACCCTGGAGCAGTTGCTGCCCTCC 236  
 Ovary CAGCCCTGGGTTTCAGTTCTGACTCTGCTGTGTTACCCTGG-AGCAGTTGCTGCCCTCC 234  
 Spleen CAGCCCTGGGTTTCAGTTCTGACTCTGCTGTGTTACCCTGG-AGCAGTTGCTGCCCTCC 234  
 Liver CAGCCCTGGGTTTCAGTTCTGACTCTGCTGTGTTACCCTGG-AGCAGTTGCTGCCCTCC 234  
 Kidney CAGCCCTGGGTTTCAGTTCTGACTCTGCTGTGTTACTCTGG-AGCAGTTGCTGCCCTCC 234  
 Heart CAGCCCTGGGTTTCAGTTCTGACTCTGCTGTGTTACTCTGG-AGCAGTTGCTGCCCTCC 234  
 \*\*\*\*\*

**SPERM** CTGGGTCACCTCTTCTGCTTCTAACAAAG-AGAGAGCTGCAGTTGGTGATTTCTGAGGCAA 293  
 Testis TGGGTCACCTCTTCTGCTTCTAACAAAGAGAGAGCTGCAGTTGGTGATTTCTGAGGCAA 296  
 Ovary CTGGGTCACCTCTTCTGCTTCTAACAAAG-AGAGAGCTGCAGTTGGTGATTTCTGAGGCAA 293  
 Spleen CTGGGTCACCTCTTCTGCTTCTAACAAAG-AGAGAGCTGCAGTTGGTGATTTCTGAGGCAA 293  
 Liver CTGGGTCACCTCTTCTGCTTCTAACAAAG-AGAGAGCTGCAGTTGGTGATTTCTGAGGCAA 293  
 Kidney CTGGGTCACCTCTTCTGCTTCTAACAAAG-AGAGAGCTGCAGTTGGTGATTTCTGAGGCAA 293  
 Heart CTGGGTCACCTCTTCTGCTTCTAACAAAG-AGAGAGCTGCAGTTGGTGATTTCTGAGGCAA 293  
 \*\*\* \*\* \* \*\*\*\*\* \*\*\*\*\* \*\*\*\*\* \*\*\*\*\* \*\*\*\*\*

**SPERM** CC-AAAATTCTCAAAGACTCTGCAGCAGTTGTAT-AACATAACAGGGAGGGGGCCCGGGA 351  
 Testis CCAAAATTCTCAAAGACTCTGCAGCAGTTGTAT-TACATAACAGGGAGGGGGCCCGGGA 355  
 Ovary CC-AAAATTCTCAAAGACTCTGCAGCAGTTGTAT-AACATAACAGGGAGGGGGCCCGGGA 351  
 Spleen CC-AAAATTCTCAAAGACTCTGCAGCAGTTG AAT-AACATAACAGGGAGGGGGCCCGGGA 351  
 Liver CC-AAAATTCTCAAAGACTCTGCAGCAGTTGTAT-AACATAACAGGGAGGGGGCCCGGGA 351  
 Kidney CC-AAAATTCTCAAAGACTCTGCAGCAGTTGTATTAACATAACAGGGAGGGGGCCCGGGA 352  
 Heart CC-AAAATTCTCAAAGACTCTGCAGCAGTTGTAT-AACATAACAGGGAGGGGGCCCGGGA 351  
 \*\* \*\*\*\*\* \*\*\*\*\* \*\*\*\*\* \*\*\*\*\* \*\*\*\*\*

**SPERM** GCCTTGGGAGTCCGATTAGAGTAAT-AAGAGGCCCTCCTCAGGGGCTGCCACCCCTG 410  
 Testis GCTTGGGAGTCCGATTAGAGTCATAGGAGGCCCTCCTCAGGGGCTGCCACCCCTG 415  
 Ovary GCCTTGGGAGTCCGATTAGAGTAAT-AAGAGGCCCTCCTCAGGGGCTGCCACCCCTG 410  
 Spleen GCCTTGGGAGTCCGATTAGAGTAAT-AAGAGGCCCTCCTCAGGGGCTGCCACCCCTG 410  
 Liver GCCTTGGGAGTCCGATTAGAGTAAT-AAGAGGCCCTCCTCAGGGGCTGCCACCCCTG 410
