# Supplementary material for: Organization and differential expression of the GACA/GATA tagged somatic and spermatozoal transcriptomes in Buffalo Bubalus bubalis
Source: PubMed Central journal article supplement (PMC2346481; doi:10.1186/1471-2164-9-132), 2008-03-20
Supplement: 1471-2164-9-132-S9.pdf [file 1471-2164-9-132-S9.pdf]

**Additional file 9: Multiple sequence alignment of GACA-tagged 523 bp transcript (Homologous to ankyrin repeat domain 26)**

|              |                                                                       |            |
|--------------|-----------------------------------------------------------------------|------------|
| <b>SPERM</b> | <b>ACAGACAGACAGACAGCAAGAGGACCACACAGACTTCCAAAGCCCCGGCCGCCACACCCCT</b>  | <b>60</b>  |
| Testis       | ACAGACAGACAGACAGCAAGAGGACCACACAGACTTCCAAAGCCCCGGCCGCCACACCCCT         | 60         |
| Ovary        | ACAGACAGACAGACAGCAAGAGGACCACACAGACTTCCAAAGCCCCGGCCGCCACACCCCT         | 60         |
|              | *****                                                                 |            |
| <b>SPERM</b> | <b>GCCGGCTCCATTCTGGGTTC</b>                                           | <b>120</b> |
| Testis       | GCCGGCTCCATTCTGGGTTC                                                  | 120        |
| Ovary        | GCCCCCA                                                               | 120        |
|              | *** * *****                                                           |            |
| <b>SPERM</b> | <b>CGACACACTCACACACACGCTCTCACGCGCTCAGCCTCTGGCCTGGGGCGGGGGCTGGG</b>    | <b>180</b> |
| Testis       | CGACACACTCACACACACGCTCTCACGCGCTCAGCCTCTGGCCTGGGGCGGGGGCTGGG           | 180        |
| Ovary        | CGACACACTCACACACACGCTCTCACGCGCTCAGCCTCTGGCCTGGGGCGGGGGCTGGG           | 180        |
|              | *****                                                                 |            |
| <b>SPERM</b> | <b>TCTCGCCTTAGGTGGCCAAAGCCGAAGGGGACCTTTGAGACCTCGGATGCGAGGAGTCTT</b>   | <b>240</b> |
| Testis       | TCTCGCCTTAGGTGGCCAAAGCCGAAGGGGACCTTTGAGACCTCGGATGCGAGGAGTCTT          | 240        |
| Ovary        | TCTCGCCTTAGGTGGCCAAAGCCGAAGGGGACCTTTGAGACCTCGGATGCGAGGAGTCTT          | 240        |
|              | *****                                                                 |            |
| <b>SPERM</b> | <b>GGGGTCCCCACGGGTGATTGCCAGCCCCAGGGCACTGCGCCCAGCCGGGGCCCGCCGGCC</b>   | <b>300</b> |
| Testis       | GGGGTCCCCACGGGTGATTGCCAGCCCCAGGGCACTGCGCCCAGCCGGGGCCCGCCGGCC          | 300        |
| Ovary        | GGGGTCCCCACGGGTGATTGCCAGCCCCAGGGCACTGCGCCCAGCCGGGGCCCGCCGGCC          | 300        |
|              | *****                                                                 |            |
| <b>SPERM</b> | <b>CAGGGCTGACGCCCCCTCCCTTAGGGAAGCTGCTTCTCCGCACGGCCTCTCTTGAGGT</b>     | <b>360</b> |
| Testis       | CAGGGCTGACGCCCCCTCCCTTAGGGAAGCTGCTTCTCCGCACGGCCTCTCTTGAGGT            | 360        |
| Ovary        | CAGGGCTGACGCCCCCTCCCTTAGGGAAGCTGCTTCTCCGCACGGCCTCTCTTGAGGT            | 360        |
|              | ** *****                                                              |            |
| <b>SPERM</b> | <b>GTGCCACGGTCTGTGCCAGTGTGTGATCTCGGAGCGGATGCCATCCCCTGTCCCCTGTC</b>    | <b>420</b> |
| Testis       | GTGCCACGGTCTGTGCCAGTGTGTGATCTCGGAGCGGATGCCATCCCCTGTCCCCTGTC           | 420        |
| Ovary        | GTGCCACGGTCTGTGCCAGTGTGTGATCTCGGAGCGGATGCCATCCCCTGTCCCCTGTC           | 420        |
|              | *****                                                                 |            |
| <b>SPERM</b> | <b>CTTCCTTCTCCCCTTCTCCGGCTCTCTGTGTCAGTCGCTCTGTGTCTCCCTGTCTCTGTCTC</b> | <b>480</b> |
| Testis       | CTTCCTTCTCCCCTTCTCCGGCTCTCTGTGTCAGTCGCTCTGTGTCTCCCTGTCTCTGTCTC        | 480        |
| Ovary        | CTTCCTTCTCCCCTTCTCCGGCTCTCTGTGTCAGTCGCTCTGTGTCTCCCTGTCTCTGTCTC        | 480        |
|              | *****                                                                 |            |
| <b>SPERM</b> | <b>TCCCTCCCCTGTGTGCCCTGCGCGCTCGTGTCTGTCTGT</b>                        | <b>523</b> |
| Testis       | TCCCTCCCCTGTGTGCCCTGCGCGCTCGTGTCTGTCTGT                               | 523        |
| Ovary        | TCCCTCCCCTGTGTGCCCTGCGCGCTCGTGTCTGTCTGT                               | 523        |
|              | *****                                                                 |            |
