# Supplementary material for: Organization and differential expression of the GACA/GATA tagged somatic and spermatozoal transcriptomes in Buffalo Bubalus bubalis
Source: PubMed Central journal article supplement (PMC2346481; doi:10.1186/1471-2164-9-132), 2008-03-20
Supplement: 1471-2164-9-132-S10.pdf [file 1471-2164-9-132-S10.pdf]

## Additional file 10: Multiple nucleotide sequence alignment of GATA-tagged novel transcript of 800 bp originating from different tissues and spermatozoa of buffalo

|              |                                                                          |            |
|--------------|--------------------------------------------------------------------------|------------|
| <b>SPERM</b> | <b>---</b> GATAGATAGATAGATAGATAGATAGATAGATACATATGTATATATCTATGTGTGTGTATGC | <b>57</b>  |
| Testis       | -----GATAGATAGATAGATAGATAGATAGATACATATGTATATATCTATGTGTGTGTATGC           | 53         |
| Spleen       | -----GATAGATAGATAGATAGATAGATAGATACATATGTATATATCTATGTGTGTGTATGC           | 53         |
| Ovary        | -----GATAGATAGATAGATAGATAGATAGATACATATGTATATATCTATGTGTGTGTATGC           | 53         |
| Liver        | -----GATAGATAGATAGATAGATAGATAGATACATATGTATATATCTATGTGTGTGTATGC           | 53         |
| Kidney       | -----GATAGATAGATAGATAGATAGATAGATACATATGTATATATCTATGTGTGTGTATGC           | 53         |
|              | *****                                                                    |            |
| <b>SPERM</b> | <b>AAACATACACACACACAAATGGATGTAATTTTTTTTT-AATCACCACCTTTGCAACCACAC</b>     | <b>116</b> |
| Testis       | AAACATACACACACACAAATGGATGTAATTTTTTTTT-AATCACCACCTTTGCAACCACAC            | 112        |
| Ovary        | AAACATACACACACACAAATGGATGTAATTTTTTTTT-AATCACCACCTTTGCAACCACAC            | 112        |
| Spleen       | AAACATACACACACACAAATGGATGTAATTTTTTTTT-AATCACCACCTTTGCAACCACAC            | 112        |
| Liver        | AAACATACACACACACAAATGGATGTAATTTTTTTTT-AATCACCACCTTTGCAACCACAC            | 112        |
| Kidney       | AAACATACACACACACAAATGGATGTAATTTTTTTTTTAAATCACCACCTTTGCAACCACAC           | 113        |
|              | *****                                                                    |            |
| <b>SPERM</b> | <b>TCGTAACAATTAACCTGAGGTGGGATGCACCCATGAATGTGAAACTAGCGGGCAAACATTT</b>     | <b>176</b> |
| Testis       | TCGTAACAATTAACCTGAGGTGGGATGCACCCATGAATGTGAAACTAGCGGGCAAACATTT            | 172        |
| Ovary        | TCGTAACAATTAACCTGAGGTGGGATGCACCCATGAATGTGAAACTAGCGGGCAAACATTT            | 172        |
| Spleen       | TCGTAACAATTAACCTGAGGTGGGATGCACCCATGAATGTGAAACTAGCGGGCAAACATTT            | 172        |
| Liver        | TCGTAACAATTAACCTGAGGTGGGATGCACCCATGAATGTGAAACTAGCGGGCAAACATTT            | 172        |
| Kidney       | TCGTAACAATTAACCTGAGGTGGGATGCACCCATGAATGTGAAACTAGCGGGCAAACATTT            | 173        |
|              | *****                                                                    |            |
| <b>SPERM</b> | <b>GATGAGGACAAACTATTGACAGAATCTCAAAGATCTTGCCAGAAATGACTGACTAATTT</b>       | <b>236</b> |
| Testis       | GATGAGGACAAACTATTGACAGAATCTCAAAGATCTTGCCAGAAATGACTGACTAATTT              | 232        |
| Ovary        | GATGAGGACAAACTATTGACAGAATCTCAAAGATCTTGCCAGAAATGACTGACTAATTT              | 232        |
| Spleen       | GATGAGGACAAACTATTGACAGAATCTCAAAGATCTTGCCAGAAATGACTGACTAATTT              | 232        |
| Liver        | GATGAGGACAAACTATTGACAGAATCTCAAAGATCTTGCCAGAAATGACTGACTAATTT              | 232        |
| Kidney       | GATGAGGACAAACTATTGACAGAATCTCAAAGATCTTGCCAGAAATGACTGACTAATTT              | 233        |
|              | *****                                                                    |            |
| <b>SPERM</b> | <b>CAATGAAAATAACATTACAGTGGAAATCTTGCCAGATACAGCCTTAACCAAATGACGAC</b>       | <b>296</b> |
| Testis       | CAATGAAAATAACATTACAGTGGAAATCTTGCCAGATACAGCCTTAACCAAATGACGAC              | 292        |
| Ovary        | CAATGAAAATAACATTACAGTGGAAATCTTGCCAGATACAGCCTTAACCAAATGACGAC              | 292        |
| Spleen       | CAATGAAAATAACATTACAGTGGAAATCTTGCCAGATACAGCCTTAACCAAATGACGAC              | 292        |
| Liver        | CAATGAAAATAACATTACAGTGGAAATCTTGCCAGATACAGCCTTAACCAAATGACGAC              | 292        |
| Kidney       | CAATGAAAATAACATTACAGTGGAAATCTTGCCAGATACAGCCTTAACCAAATGACGAC              | 293        |
|              | **** ** *****                                                            |            |
| <b>SPERM</b> | <b>ACTAATAATGAGAAATACCAACATCAGGTGCCTCCAGCATGAAAAAAACACGTCATGTA</b>       | <b>356</b> |
| Testis       | ACTAATAATGAGAAATACCAACATCAGGTGCCTCCAGCATGAAAAAAACACGTCATGTA              | 352        |
| Ovary        | ACTAATAATGAGAAATACCAACATCAGGTGCCTCCAGCATGAAAAAAACACGTCATGTA              | 352        |
| Spleen       | ACTAATAATGAGAAATACCAACATCAGGTGCCTCCAGCATGAAAAAAACACGTCATGTA              | 352        |
| Liver        | ACTAATAATGAGAAATACCAACATCAGGTGCCTCCAGCATGAAAAAAACACGTCATGTA              | 352        |
| Kidney       | ACTAATAATGAGAAATACCAACATCAGGTGCCTCCAGCATGAAAAAAACACGTCATGTA              | 353        |
|              | *****                                                                    |            |
| <b>SPERM</b> | <b>TGTGATGTTCTTGCCAAAAATGTCATCGTCTGCATCTGGGCATGAAGACACATCAGCTCC</b>      | <b>416</b> |
| Testis       | TGTGATGTTCTTGCCAAAAATGTCATCGTCTGCATCTGGGCATGAAGACACATCAGCTCC             | 412        |
| Ovary        | TGTGATGTTCTTGCCAAAAATGTCATCGTCTGCATCTGGGCATGAAGACACATCAGCTCC             | 412        |
| Spleen       | TGTGATGTTCTTGCCAAAAATGTCATCGTCTGCATCTGGGCATGAAGACACATCAGCTCC             | 412        |
| Liver        | TGTGATGTTCTTGCCAAAAATGTCATCGTCTGCATCTGGGCATGAAGACACATCAGCTCC             | 412        |
| Kidney       | TGTGATGTTCTTGCCAAAAATGTCATCGTCTGCATCTGGGCATGAAGACACATCAGCTCC             | 413        |
|              | **** *****                                                               |            |
| <b>SPERM</b> | <b>TCTAAACGAGTCAACACAAATGTCTACTCCTTGAA-----ACAGAAAAATA</b>               | <b>462</b> |
| Testis       | TCTAAACGAGTCAACACAAATGTCTACTCCTTGAA-----ACAGAAAAATA                      | 458        |
| Ovary        | TCTAAACGAGTCAACACAAATGTCTACTCCTTGAA-----ACAGAAAAATA                      | 458        |
| Spleen       | TCTAAACGAGTCAACACAAATGTCTACTCCTTGAAACAGAAACCTTGAAACAGAAAAATA             | 472        |

Liver TCTAAACGAGTCAACACAAATGTCTACTCCTTGAA-----ACAGAAAAATA 58  
Kidney TCTAAACGAGTCAACACAAATGTCTACTCCTTGAA-----ACAGAAAAATA 459  
\*\*\*\*\*

**SPERM** AACTAAACAAACTAAAGAGATACAACAATAAGTGCATTGTGTGATCCTGTACTGGCTCC 522  
Testis AACTAAACAAACTAAAGAGATACAACAATAAGTGCATTGTGTGATCCTGTACTGGCTCC 518  
Ovary AACTAAACAAACTAAAGAGATACAACAATAAGTGCATTGTGCGATCCTGTACTGGCTCC 518  
Spleen AACTAAACAAACTAAAGAGATACAACAATAAGTGCATTGTGTGATCCTGTACTGGCTCC 532  
Liver AACTAAACAAACTAAAGAGATACAACAATAAGTGCATTGTGTGATCCTGTACTGGCTCC 518  
Kidney AACTAAACAAACTAAAGAGATACAACAATAAGTGCATTGTGTGATCCTGTACTGGCTCC 519  
\*\*\*\*\*

**SPERM** CTGAGTGGAAAAAAGTTATAAAGAACACTGTCGGGAAAGTTGGAAATTTTTGAATAATAA 582  
Testis CTGAGTGGAAAAAAGTTATAAAGAACACTGTCGGGAAAGTTGGAAATTTTTGAATAATAA 578  
Ovary CTGAGTGGAAAAAAGTTATAAAGAACACTGTCGGGAAAGTTGGAAATTTTTGAATAATAA 578  
Spleen CTGAGTGGAAAAAAGTTATAAAGAACACTGTCGGGAAAGTTGGAAATTTTTGAATAATAA 592  
Liver CTGAGTGGAAAAAAGTTATAAAGAACACTGTCGGGAAAGTTGGAAATTTTTGAATAATAA 578  
Kidney CTGAGTGGAAAAAAGTTATAAAGAACACTGTCGGGAAAGTTGGAAATTTTTGAATAATAA 579  
\*\*\*\*\*

**SPERM** TAATGTATCAAATAATAATATGTATCAAGATTAATAGCCTAATATTTATAATCATATT 642  
Testis TAATGTATCAAATAATAATATGTATCAAGATTAATAGCCTAATATTTATAATCATATT 638  
Ovary TAATGTATCAAATAATAATATGTATCAAGATTAATAGCCTAATATTTATAATCATATT 638  
Spleen TAATGTATCAAATAATAATATGTATCAAGATTAATAGCCTAATATTTATAATCATATT 652  
Liver TAATGTATCAAATAATAATATGTATCAAGATTAATAGCCTAATATTTATAATCATATT 638  
Kidney TAATGTATCAAATAATAATATGTATCAAGATTAATAGCCTAATATTTATAATCATATT 639  
\*\*\*\*\*

**SPERM** AGAAATATGCAATCTTTGGAAATATGCACTAAAGTGTGGGATAAAGAGCATGATATCT 702  
Testis AGAAATATGCAATCTTTGGAAATATGCACTAAAGTGTGGGATAAAGAGCATGATATCT 698  
Ovary AGAAATATGCAATCTTTGGAAATATGCACTAAAGTGTGGGATAAAGAGCATGATATCT 698  
Spleen AGAAATATGCAATCTTTGGAAATATGCACTAAAGTGTGGGATAAAGAGCATGATATCT 712  
Liver AGAAATATGCAATCTTTGGAAATATGCACTAAAGTGTGGGATAAAGAGCATGATATCT 698  
Kidney AGAAATATGCAATCTTTGGAAATATGCACTAAAGTGTGGGATAAAGAGCATGATATCT 699  
\*\*\*\*\*

**SPERM** GTAGCTTACTCCAAAAGCGTAGGAAAAATGTTAATTCGCAGTATGTCCTTATTTGTCTA 762  
Testis GTAGCTTACTCCAAAAGCGTAGGAAAAATGTTAATTCGCAGTATGTCCTTATTTGTCTA 758  
Ovary GTAGCTTACTCCAAAAGCGTAGGAAAAATGTTAATTCGCAGTATGTCCTTATTTGTCTA 758  
Spleen GTAGCTTACTCCAAAAGCGTAGGAAAAATGTTAATTCGCAGTATGTCCTTATTTGTCTA 772  
Liver GTAGCTTACTCCAAAAGCGTAGGAAAAATGTTAATTCGCAGTATGTCCTTATTTGTCTA 758  
Kidney GTAGCTTACTCCAAAAGCGTAGGAAAAATGTTAATTCGCAGTATGTCCTTATTTGTCTA 759  
\*\*\*\*\*

**SPERM** TCATCTATCTATCTATGTATCTACCTATCTATCTATCTATCTATCTATC 811  
Testis TCATCTATCTATCTATGTATCTACCTATCTATCTATCTATCTATCTATC 807  
Ovary TCATCCATCTATCTATGTATCTACCTATCTATCTATCTATCTATCTATC 807  
Liver TCATCTATCTATCTATGTATCTACCTATCTATCTATCTATCTATCTATC 807  
Kidney TCATCTATCTATCTATGTATCTACCTATCTATCTATCTATCTATCTATC 808  
Spleen TCATCTATCTATCTATGTATCTACCTATCTATCTATCTATCTATCTATC 821  
\*\*\*\*\*
