# Supplementary material for: Organization and differential expression of the GACA/GATA tagged somatic and spermatozoal transcriptomes in Buffalo Bubalus bubalis
Source: PubMed Central journal article supplement (PMC2346481; doi:10.1186/1471-2164-9-132), 2008-03-20
Supplement: 1471-2164-9-132-S11.pdf [file 1471-2164-9-132-S11.pdf]

**Additional file 11: Multiple sequence alignment of GATA-tagged novel 425 bp transcript originating from different tissues and spermatozoa of buffalo**

**Sperm** GATAGATAGATAGATAGATAGATACTGATTGAATGGATGAAAGATACTTTGAAATATGTT 60  
 Testis GATAGATAGATAGATAGATAGATACTGATTGAATGGATGAAAGATACTTTGAAATATGTT 60  
 Ovary GATAGATAGATAGATAGATAGATACTGATTGAATGGATGAAAGATACTTTGAAATATGTT 60  
 Spleen GATAGATAGATAGATAGATAGATACTGATTGAATGGATGAAAGATACTTTGAAATATGTT 60  
 Liver GATAGATAGATAGATAGATAGATACTGATTGAATGGATGAAAGATACTTTGAAATATGTT 60  
 Kidney GATAGATAGATAGATAGATAGATACTGATTGAATGGATGAAAGATACTTTGAAATATGTT 60  
 \*\*\*\*\*

**Sperm** ATTTTGAAGCTAACGTTACGAGATAAAACAGATTGGAAATATGAATAGTGGTTTTTGTG 120  
 Testis ATTTTGAAGCTAACGTTACGAGATAAAACAGATTGGAAATATGAATAGTGGTTTTTGTG 120  
 Ovary ATTTTGAAGCTAACGTTACGAGATAAAACAGATTGGAAATATGAATAGTGGTTTTTGTG 120  
 Spleen ATTTTGAAGCTAACGTTACGAGATAAAACAGATTGGAAATATGAATAGTGGTTTTTGTG 120  
 Liver ATTTTGAAGCTAACGTTACGAGATAAAACAGATTGGAAATATGAATAGTGGTTTTTGTG 120  
 Kidney ATTTTGAAGCTAACGTTACGAGATAAAACAGACTGGAAATATGAATAGTGGTTTTTGTG 120  
 \*\*\*\*\*

**Sperm** TCCTGCAGTTCTCTGAACTGGACTATGTTGTGAGAAAATAAATAAAATGTTTAAAGATTAC 180  
 Testis TCCTGCAGTTCTCTGAACTGGACTATGTTGTGAGAAAATAAATAAAATGTTTAAAGATTAC 180  
 Ovary TCCTGCAGTTCTCTGAACTGGACTATGTTGTGAGAAAATAAATAAAATGTTTAAAGATTAC 180  
 Spleen TCCTGCAGTTCTCTGAACTGGACTATGTTGTGAGAAAATAAATAAAATGTTTAAAGATTAC 180  
 Liver TCCTGCAGTTCTCTGAACTGGACTATGTTGTGAGAAAATAAATAAAATGTTTAAAGATTAC 180  
 Kidney TCCTGCAGTTCTCTGAACTGGACTATGTTGTGAGAAAATAAATAAAATGTTTAAAGATTAC 180  
 \*\*\*\*\*

**Seprn** AGATTTAAAATTGGACAAACTCAGGTTTGATTCTACTTCTGCTTGAACCTGAACAAATT 240  
 Testis AGATTTAAAATTGGACAAACTCAGGTTTGATTCTACTTCTGCTTGAACCTGAACAAATT 240  
 Ovary AGATATAAAAATTGGACAAACTCAGGTTTGATTCTACTTCTGCTTGAACCTGAACAAATT 240  
 Spleen AGATTTAAAATTGGACAAACTCAGGTTTGATTCTACTTCTGCTTGAACCTGAACAAATT 240  
 Liver AGATTTAAAATTGGACAAACTCAGGTTTGATTCTACTTCTGCTTGAACCTGAACAAATT 240  
 Kidney AGATTTAAAATTGGACAAACTCAGGTTTGATTCTACTTCTGCTTGAACCTGAACAAATT 240  
 \*\*\*\* \*\*\*\*\*

**Sperm** ACTTAAATTTTCTAGGCACCTTCCTTTTGTATAGTAGTTTGTAAGTATTCATAATAATAGC 300  
 Testis ACTTAAATTTTCTAGGCACCTTCCTTTTGTATAGTAGTTTGTAAGTATTCATAATAATAGC 300  
 Ovary ACTTAAATTTTCTAGGCACCTTCCTTTTGTATAGTAGTTTGTAAGTATTCATAATAATAGC 300  
 Spleen ACTTAAATTTTCTAGGCACCTTCCTTTTGTATAGTAGTTTGTAAGTATTCATAATAATAGC 300  
 Liver ACTTAAATTTTCTAGGCACCTTCCTTTTGTATAGTAGTTTGTAAGTATTCATAATAATAGC 300  
 Kidney ACTTAAATTTTCTAGGCACCTTCCTTTTGTATAGTAGTTTGTAAGTATTCATAATAATAGC 300  
 \*\*\*\*\*

**Sperm** ATAGGTGAAGGATTAATATGGAGGCATTCAAACTATCTGGTTTACAGCATACCCAGA 360  
 Testis ATAGGTGAAGGATTAATATGGAGGCATTCAAACTATCTGGTTTACAGCATACCCAGA 360  
 Ovary ATAGGTGAAGGATTAATATGGAGGCATTCAAACTATCTGGTTTACAGCATACCCAGA 360  
 Spleen ATAGGTGAAGGATTAATATGGAGGCATTCAAACTATCTGGTTTACAGCATACCCAGA 360  
 Liver ATAGGTGAAGGATTAATATGGAGGCATTCAAACTATCTGGTTTACAGCATACCCAGA 360  
 Kidney ATAGGTGAAGGATTAATATGGAGGCATTCAAACTATCTGGTTTACAGCATACCCAGA 360  
 \*\*\*\*\*

**Sperm** ACAAAGGTAATGTTCTGTAATATCAGCTATTCATATATGTGTATCTATCTATCTATCTAT 420  
 Testis ACAAAGGTAATGTTCTGTAATATCAGCTATTCATATATGTGTATCTATCTATCTATCTAT 420  
 Ovary ACAAAGGTAATGTTCTGTAATATCAGCTATTCATATATGTGTATCTATCTATCTATCTAT 420  
 Spleen ACAAAGGTAATGTTCTGTAATATCAGCTATTCATATATGTGTATCTATCTATCTATCTAT 420  
 Liver ACAAAGGTAATGTTCTGTAATATCAGCTATTCATATATGTGTATCTATCTATCTATCTAT 420  
 Kidney ACAAAGGTAATGTTCTGTAATATCAGCTATTCATATATGTGTATCTATCTATCTATCTAT 420  
 \*\*\*\*\*

**Sperm** CTATC 425  
 Testis CTATC 425  
 Ovary CTATC 425  
 Spleen CTATC 425  
 Liver CTATC 425  
 Kidney CTATC 425  
 \*\*\*\*\*
