# Supplementary material for: Organization and differential expression of the GACA/GATA tagged somatic and spermatozoal transcriptomes in Buffalo Bubalus bubalis
Source: PubMed Central journal article supplement (PMC2346481; doi:10.1186/1471-2164-9-132), 2008-03-20
Supplement: 1471-2164-9-132-S12.pdf [file 1471-2164-9-132-S12.pdf]

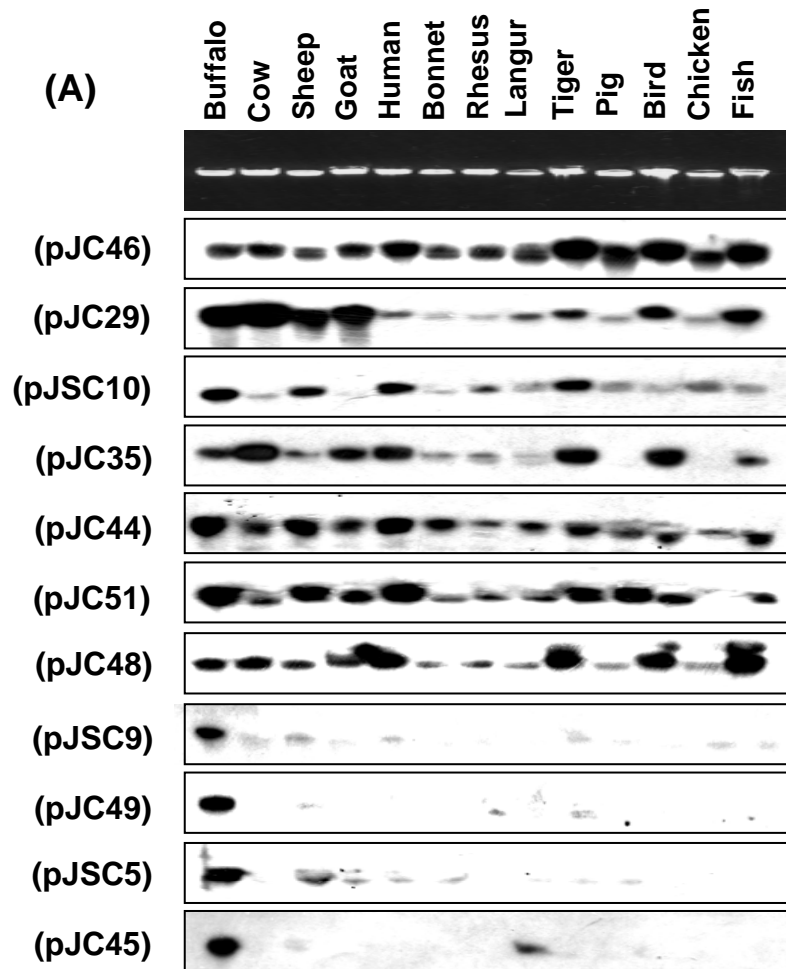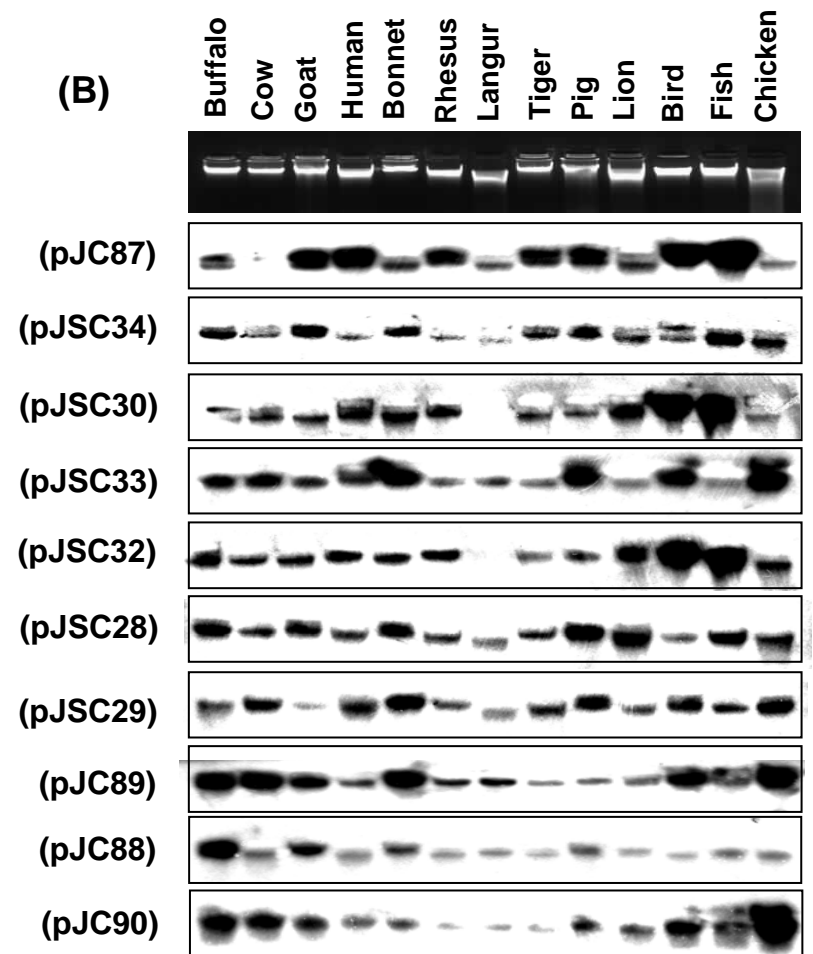

Additional file 12: Evolutionary conservation of GACA/GATA tagged transcripts across species
